# Supplementary material for: Selection of Optimal Ancestry Informative Markers for Classification and Ancestry Proportion Estimation in Pigs
Source: Front Genet. 2019 Mar 11;10:183. doi: 10.3389/fgene.2019.00183 (PMC6421339; doi:10.3389/fgene.2019.00183)
Supplement: Supplementary file 2 [file Table_2.xlsx]

## Sheet: Table S1
Table S1. Information of 71 pig populations used in this study.
Sample Name	Breed Name	Breed Abbreviation	Country
CNBM_1_J	China_Bamei	CNBM	China
CNBM_10_J	China_Bamei	CNBM	China
CNBM_11_J	China_Bamei	CNBM	China
CNBM_12_J	China_Bamei	CNBM	China
CNBM_13_J	China_Bamei	CNBM	China
CNBM_14_J	China_Bamei	CNBM	China
CNBM_15_J	China_Bamei	CNBM	China
CNBM_16_J	China_Bamei	CNBM	China
CNBM_2_J	China_Bamei	CNBM	China
CNBM_3_J	China_Bamei	CNBM	China
CNBM_4_J	China_Bamei	CNBM	China
CNBM_5_J	China_Bamei	CNBM	China
CNBM_6_J	China_Bamei	CNBM	China
CNBM_7_J	China_Bamei	CNBM	China
CNBM_8_J	China_Bamei	CNBM	China
CNBM_9_J	China_Bamei	CNBM	China
CNBX_1_J	China_Bamaxiang	CNBX	China
CNBX_10_J	China_Bamaxiang	CNBX	China
CNBX_11_J	China_Bamaxiang	CNBX	China
CNBX_12_J	China_Bamaxiang	CNBX	China
CNBX_13_J	China_Bamaxiang	CNBX	China
CNBX_14_J	China_Bamaxiang	CNBX	China
CNBX_15_J	China_Bamaxiang	CNBX	China
CNBX_16_J	China_Bamaxiang	CNBX	China
CNBX_2_J	China_Bamaxiang	CNBX	China
CNBX_3_J	China_Bamaxiang	CNBX	China
CNBX_4_J	China_Bamaxiang	CNBX	China
CNBX_5_J	China_Bamaxiang	CNBX	China
CNBX_6_J	China_Bamaxiang	CNBX	China
CNBX_7_J	China_Bamaxiang	CNBX	China
CNBX_8_J	China_Bamaxiang	CNBX	China
CNBX_9_J	China_Bamaxiang	CNBX	China
CNCJ_1_J	China_Congjiangxiang	CNCJ	China
CNCJ_10_J	China_Congjiangxiang	CNCJ	China
CNCJ_11_J	China_Congjiangxiang	CNCJ	China
CNCJ_12_J	China_Congjiangxiang	CNCJ	China
CNCJ_13_J	China_Congjiangxiang	CNCJ	China
CNCJ_14_J	China_Congjiangxiang	CNCJ	China
CNCJ_15_J	China_Congjiangxiang	CNCJ	China
CNCJ_16_J	China_Congjiangxiang	CNCJ	China
CNCJ_2_J	China_Congjiangxiang	CNCJ	China
CNCJ_3_J	China_Congjiangxiang	CNCJ	China
CNCJ_4_J	China_Congjiangxiang	CNCJ	China
CNCJ_5_J	China_Congjiangxiang	CNCJ	China
CNCJ_6_J	China_Congjiangxiang	CNCJ	China
CNCJ_7_J	China_Congjiangxiang	CNCJ	China
CNCJ_8_J	China_Congjiangxiang	CNCJ	China
CNCJ_9_J	China_Congjiangxiang	CNCJ	China
CNDH_1_J	China_Guangdongdahuabai	CNDH	China
CNDH_10_J	China_Guangdongdahuabai	CNDH	China
CNDH_11_J	China_Guangdongdahuabai	CNDH	China
CNDH_12_J	China_Guangdongdahuabai	CNDH	China
CNDH_13_J	China_Guangdongdahuabai	CNDH	China
CNDH_14_J	China_Guangdongdahuabai	CNDH	China
CNDH_15_J	China_Guangdongdahuabai	CNDH	China
CNDH_16_J	China_Guangdongdahuabai	CNDH	China
CNDH_2_J	China_Guangdongdahuabai	CNDH	China
CNDH_3_J	China_Guangdongdahuabai	CNDH	China
CNDH_4_J	China_Guangdongdahuabai	CNDH	China
CNDH_5_J	China_Guangdongdahuabai	CNDH	China
CNDH_6_J	China_Guangdongdahuabai	CNDH	China
CNDH_7_J	China_Guangdongdahuabai	CNDH	China
CNDH_8_J	China_Guangdongdahuabai	CNDH	China
CNDH_9_J	China_Guangdongdahuabai	CNDH	China
CNDN_10_J	China_Diannanxiaoer	CNDN	China
CNDN_11_J	China_Diannanxiaoer	CNDN	China
CNDN_13_J	China_Diannanxiaoer	CNDN	China
CNDN_14_J	China_Diannanxiaoer	CNDN	China
CNDN_15_J	China_Diannanxiaoer	CNDN	China
CNDN_2_J	China_Diannanxiaoer	CNDN	China
CNDN_3_J	China_Diannanxiaoer	CNDN	China
CNDN_4_J	China_Diannanxiaoer	CNDN	China
CNDN_5_J	China_Diannanxiaoer	CNDN	China
CNDN_6_J	China_Diannanxiaoer	CNDN	China
CNDN_7_J	China_Diannanxiaoer	CNDN	China
CNDN_8_J	China_Diannanxiaoer	CNDN	China
CNDN_9_J	China_Diannanxiaoer	CNDN	China
CNDQ_1_J	China_DiqingZang	CNDQ	China
CNDQ_10_J	China_DiqingZang	CNDQ	China
CNDQ_11_J	China_DiqingZang	CNDQ	China
CNDQ_12_J	China_DiqingZang	CNDQ	China
CNDQ_13_J	China_DiqingZang	CNDQ	China
CNDQ_14_J	China_DiqingZang	CNDQ	China
CNDQ_15_J	China_DiqingZang	CNDQ	China
CNDQ_16_J	China_DiqingZang	CNDQ	China
CNDQ_17_J	China_DiqingZang	CNDQ	China
CNDQ_18_J	China_DiqingZang	CNDQ	China
CNDQ_19_J	China_DiqingZang	CNDQ	China
CNDQ_2_J	China_DiqingZang	CNDQ	China
CNDQ_3_J	China_DiqingZang	CNDQ	China
CNDQ_4_J	China_DiqingZang	CNDQ	China
CNDQ_5_J	China_DiqingZang	CNDQ	China
CNDQ_6_J	China_DiqingZang	CNDQ	China
CNDQ_7_J	China_DiqingZang	CNDQ	China
CNDQ_8_J	China_DiqingZang	CNDQ	China
CNDQ_9_J	China_DiqingZang	CNDQ	China
CNDS_1_J	China_Dongshan	CNDS	China
CNDS_10_J	China_Dongshan	CNDS	China
CNDS_11_J	China_Dongshan	CNDS	China
CNDS_12_J	China_Dongshan	CNDS	China
CNDS_13_J	China_Dongshan	CNDS	China
CNDS_14_J	China_Dongshan	CNDS	China
CNDS_15_J	China_Dongshan	CNDS	China
CNDS_2_J	China_Dongshan	CNDS	China
CNDS_3_J	China_Dongshan	CNDS	China
CNDS_4_J	China_Dongshan	CNDS	China
CNDS_5_J	China_Dongshan	CNDS	China
CNDS_6_J	China_Dongshan	CNDS	China
CNDS_7_J	China_Dongshan	CNDS	China
CNDS_8_J	China_Dongshan	CNDS	China
CNDS_9_J	China_Dongshan	CNDS	China
CNEH_1_J	China_Erhualian	CNEH	China
CNEH_10_J	China_Erhualian	CNEH	China
CNEH_11_J	China_Erhualian	CNEH	China
CNEH_12_J	China_Erhualian	CNEH	China
CNEH_13_J	China_Erhualian	CNEH	China
CNEH_14_J	China_Erhualian	CNEH	China
CNEH_15_J	China_Erhualian	CNEH	China
CNEH_16_J	China_Erhualian	CNEH	China
CNEH_2_J	China_Erhualian	CNEH	China
CNEH_21_J	China_Erhualian	CNEH	China
CNEH_26_J	China_Erhualian	CNEH	China
CNEH_27_J	China_Erhualian	CNEH	China
CNEH_28_J	China_Erhualian	CNEH	China
CNEH_3_J	China_Erhualian	CNEH	China
CNEH_4_J	China_Erhualian	CNEH	China
CNEH_5_J	China_Erhualian	CNEH	China
CNEH_6_J	China_Erhualian	CNEH	China
CNEH_7_J	China_Erhualian	CNEH	China
CNEH_8_J	China_Erhualian	CNEH	China
CNEH_9_J	China_Erhualian	CNEH	China
CNGS_1_J	China_GansuZang	CNGS	China
CNGS_10_J	China_GansuZang	CNGS	China
CNGS_11_J	China_GansuZang	CNGS	China
CNGS_12_J	China_GansuZang	CNGS	China
CNGS_13_J	China_GansuZang	CNGS	China
CNGS_14_J	China_GansuZang	CNGS	China
CNGS_15_J	China_GansuZang	CNGS	China
CNGS_16_J	China_GansuZang	CNGS	China
CNGS_17_J	China_GansuZang	CNGS	China
CNGS_18_J	China_GansuZang	CNGS	China
CNGS_19_J	China_GansuZang	CNGS	China
CNGS_2_J	China_GansuZang	CNGS	China
CNGS_20_J	China_GansuZang	CNGS	China
CNGS_21_J	China_GansuZang	CNGS	China
CNGS_3_J	China_GansuZang	CNGS	China
CNGS_5_J	China_GansuZang	CNGS	China
CNGS_6_J	China_GansuZang	CNGS	China
CNGS_7_J	China_GansuZang	CNGS	China
CNGS_8_J	China_GansuZang	CNGS	China
CNGS_9_J	China_GansuZang	CNGS	China
CNGU_1_W	China_Guanling	CNGU	China
CNGU_10_W	China_Guanling	CNGU	China
CNGU_11_W	China_Guanling	CNGU	China
CNGU_12_W	China_Guanling	CNGU	China
CNGU_13_W	China_Guanling	CNGU	China
CNGU_14_W	China_Guanling	CNGU	China
CNGU_15_W	China_Guanling	CNGU	China
CNGU_16_W	China_Guanling	CNGU	China
CNGU_17_W	China_Guanling	CNGU	China
CNGU_18_W	China_Guanling	CNGU	China
CNGU_2_W	China_Guanling	CNGU	China
CNGU_3_W	China_Guanling	CNGU	China
CNGU_4_W	China_Guanling	CNGU	China
CNGU_5_W	China_Guanling	CNGU	China
CNGU_6_W	China_Guanling	CNGU	China
CNGU_7_W	China_Guanling	CNGU	China
CNGU_8_W	China_Guanling	CNGU	China
CNGU_9_W	China_Guanling	CNGU	China
CNGX_1_J	China_Ganxiliangtouwu	CNGX	China
CNGX_10_J	China_Ganxiliangtouwu	CNGX	China
CNGX_11_J	China_Ganxiliangtouwu	CNGX	China
CNGX_12_J	China_Ganxiliangtouwu	CNGX	China
CNGX_13_J	China_Ganxiliangtouwu	CNGX	China
CNGX_2_J	China_Ganxiliangtouwu	CNGX	China
CNGX_3_J	China_Ganxiliangtouwu	CNGX	China
CNGX_4_J	China_Ganxiliangtouwu	CNGX	China
CNGX_5_J	China_Ganxiliangtouwu	CNGX	China
CNGX_6_J	China_Ganxiliangtouwu	CNGX	China
CNGX_7_J	China_Ganxiliangtouwu	CNGX	China
CNGX_8_J	China_Ganxiliangtouwu	CNGX	China
CNGX_9_J	China_Ganxiliangtouwu	CNGX	China
CNHT_1_J	China_Hetaodaer	CNHT	China
CNHT_10_J	China_Hetaodaer	CNHT	China
CNHT_11_J	China_Hetaodaer	CNHT	China
CNHT_12_J	China_Hetaodaer	CNHT	China
CNHT_13_J	China_Hetaodaer	CNHT	China
CNHT_14_J	China_Hetaodaer	CNHT	China
CNHT_15_J	China_Hetaodaer	CNHT	China
CNHT_16_J	China_Hetaodaer	CNHT	China
CNHT_2_J	China_Hetaodaer	CNHT	China
CNHT_3_J	China_Hetaodaer	CNHT	China
CNHT_4_J	China_Hetaodaer	CNHT	China
CNHT_5_J	China_Hetaodaer	CNHT	China
CNHT_6_J	China_Hetaodaer	CNHT	China
CNHT_7_J	China_Hetaodaer	CNHT	China
CNHT_8_J	China_Hetaodaer	CNHT	China
CNHT_9_J	China_Hetaodaer	CNHT	China
CNJH_10_J	China_Jinhua	CNJH	China
CNJH_11_J	China_Jinhua	CNJH	China
CNJH_12_J	China_Jinhua	CNJH	China
CNJH_14_W	China_Jinhua	CNJH	China
CNJH_15_W	China_Jinhua	CNJH	China
CNJH_16_W	China_Jinhua	CNJH	China
CNJH_18_W	China_Jinhua	CNJH	China
CNJH_19_W	China_Jinhua	CNJH	China
CNJH_20_W	China_Jinhua	CNJH	China
CNJH_21_W	China_Jinhua	CNJH	China
CNJH_22_W	China_Jinhua	CNJH	China
CNJH_23_W	China_Jinhua	CNJH	China
CNJH_25_W	China_Jinhua	CNJH	China
CNJH_26_W	China_Jinhua	CNJH	China
CNJH_27_W	China_Jinhua	CNJH	China
CNJH_28_W	China_Jinhua	CNJH	China
CNJH_29_W	China_Jinhua	CNJH	China
CNJH_30_W	China_Jinhua	CNJH	China
CNJH_8_J	China_Jinhua	CNJH	China
CNJH_9_J	China_Jinhua	CNJH	China
CNJQ_1_W	China_Jiangquhai	CNJQ	China
CNJQ_10_W	China_Jiangquhai	CNJQ	China
CNJQ_11_W	China_Jiangquhai	CNJQ	China
CNJQ_2_W	China_Jiangquhai	CNJQ	China
CNJQ_3_W	China_Jiangquhai	CNJQ	China
CNJQ_4_W	China_Jiangquhai	CNJQ	China
CNJQ_5_W	China_Jiangquhai	CNJQ	China
CNJQ_6_W	China_Jiangquhai	CNJQ	China
CNJQ_7_W	China_Jiangquhai	CNJQ	China
CNJQ_8_W	China_Jiangquhai	CNJQ	China
CNJQ_9_W	China_Jiangquhai	CNJQ	China
CNKL_1_J	China_Kele	CNKL	China
CNKL_10_J	China_Kele	CNKL	China
CNKL_2_J	China_Kele	CNKL	China
CNKL_3_J	China_Kele	CNKL	China
CNKL_4_J	China_Kele	CNKL	China
CNKL_5_J	China_Kele	CNKL	China
CNKL_6_J	China_Kele	CNKL	China
CNKL_7_J	China_Kele	CNKL	China
CNKL_8_J	China_Kele	CNKL	China
CNKL_9_J	China_Kele	CNKL	China
CNLA_1_J	China_Leanhua	CNLA	China
CNLA_10_J	China_Leanhua	CNLA	China
CNLA_11_J	China_Leanhua	CNLA	China
CNLA_12_J	China_Leanhua	CNLA	China
CNLA_13_J	China_Leanhua	CNLA	China
CNLA_14_J	China_Leanhua	CNLA	China
CNLA_15_J	China_Leanhua	CNLA	China
CNLA_16_J	China_Leanhua	CNLA	China
CNLA_17_J	China_Leanhua	CNLA	China
CNLA_2_J	China_Leanhua	CNLA	China
CNLA_3_J	China_Leanhua	CNLA	China
CNLA_4_J	China_Leanhua	CNLA	China
CNLA_5_J	China_Leanhua	CNLA	China
CNLA_6_J	China_Leanhua	CNLA	China
CNLA_7_J	China_Leanhua	CNLA	China
CNLA_8_J	China_Leanhua	CNLA	China
CNLA_9_J	China_Leanhua	CNLA	China
CNLC_1_J	China_Lichahei	CNLC	China
CNLC_10_J	China_Lichahei	CNLC	China
CNLC_11_J	China_Lichahei	CNLC	China
CNLC_12_J	China_Lichahei	CNLC	China
CNLC_13_J	China_Lichahei	CNLC	China
CNLC_14_J	China_Lichahei	CNLC	China
CNLC_2_J	China_Lichahei	CNLC	China
CNLC_3_J	China_Lichahei	CNLC	China
CNLC_4_J	China_Lichahei	CNLC	China
CNLC_5_J	China_Lichahei	CNLC	China
CNLC_6_J	China_Lichahei	CNLC	China
CNLC_7_J	China_Lichahei	CNLC	China
CNLC_8_J	China_Lichahei	CNLC	China
CNLC_9_J	China_Lichahei	CNLC	China
CNLH_1_J	China_Laiwuhei	CNLH	China
CNLH_10_J	China_Laiwuhei	CNLH	China
CNLH_11_J	China_Laiwuhei	CNLH	China
CNLH_12_J	China_Laiwuhei	CNLH	China
CNLH_13_J	China_Laiwuhei	CNLH	China
CNLH_14_J	China_Laiwuhei	CNLH	China
CNLH_15_J	China_Laiwuhei	CNLH	China
CNLH_16_J	China_Laiwuhei	CNLH	China
CNLH_17_J	China_Laiwuhei	CNLH	China
CNLH_18_J	China_Laiwuhei	CNLH	China
CNLH_2_J	China_Laiwuhei	CNLH	China
CNLH_3_J	China_Laiwuhei	CNLH	China
CNLH_4_J	China_Laiwuhei	CNLH	China
CNLH_5_J	China_Laiwuhei	CNLH	China
CNLH_6_J	China_Laiwuhei	CNLH	China
CNLH_7_J	China_Laiwuhei	CNLH	China
CNLH_8_J	China_Laiwuhei	CNLH	China
CNLH_9_J	China_Laiwuhei	CNLH	China
CNLP_1_W	China_Leping_Spotted	CNLP	China
CNLP_10_W	China_Leping_Spotted	CNLP	China
CNLP_11_W	China_Leping_Spotted	CNLP	China
CNLP_12_W	China_Leping_Spotted	CNLP	China
CNLP_13_W	China_Leping_Spotted	CNLP	China
CNLP_14_W	China_Leping_Spotted	CNLP	China
CNLP_15_W	China_Leping_Spotted	CNLP	China
CNLP_16_W	China_Leping_Spotted	CNLP	China
CNLP_17_W	China_Leping_Spotted	CNLP	China
CNLP_18_W	China_Leping_Spotted	CNLP	China
CNLP_19_W	China_Leping_Spotted	CNLP	China
CNLP_2_W	China_Leping_Spotted	CNLP	China
CNLP_20_W	China_Leping_Spotted	CNLP	China
CNLP_3_W	China_Leping_Spotted	CNLP	China
CNLP_4_W	China_Leping_Spotted	CNLP	China
CNLP_5_W	China_Leping_Spotted	CNLP	China
CNLP_6_W	China_Leping_Spotted	CNLP	China
CNLP_7_W	China_Leping_Spotted	CNLP	China
CNLP_8_W	China_Leping_Spotted	CNLP	China
CNLP_9_W	China_Leping_Spotted	CNLP	China
CNLT_1_W	China_Lantang	CNLT	China
CNLT_10_W	China_Lantang	CNLT	China
CNLT_11_W	China_Lantang	CNLT	China
CNLT_12_W	China_Lantang	CNLT	China
CNLT_13_W	China_Lantang	CNLT	China
CNLT_14_W	China_Lantang	CNLT	China
CNLT_15_W	China_Lantang	CNLT	China
CNLT_16_W	China_Lantang	CNLT	China
CNLT_17_W	China_Lantang	CNLT	China
CNLT_18_W	China_Lantang	CNLT	China
CNLT_19_W	China_Lantang	CNLT	China
CNLT_2_W	China_Lantang	CNLT	China
CNLT_20_W	China_Lantang	CNLT	China
CNLT_3_W	China_Lantang	CNLT	China
CNLT_4_W	China_Lantang	CNLT	China
CNLT_5_W	China_Lantang	CNLT	China
CNLT_6_W	China_Lantang	CNLT	China
CNLT_7_W	China_Lantang	CNLT	China
CNLT_8_W	China_Lantang	CNLT	China
CNLT_9_W	China_Lantang	CNLT	China
CNLU_1_J	China_Luchuan	CNLU	China
CNLU_10_J	China_Luchuan	CNLU	China
CNLU_11_J	China_Luchuan	CNLU	China
CNLU_12_J	China_Luchuan	CNLU	China
CNLU_13_J	China_Luchuan	CNLU	China
CNLU_14_J	China_Luchuan	CNLU	China
CNLU_15_J	China_Luchuan	CNLU	China
CNLU_16_J	China_Luchuan	CNLU	China
CNLU_17_J	China_Luchuan	CNLU	China
CNLU_18_J	China_Luchuan	CNLU	China
CNLU_2_J	China_Luchuan	CNLU	China
CNLU_3_J	China_Luchuan	CNLU	China
CNLU_4_J	China_Luchuan	CNLU	China
CNLU_5_J	China_Luchuan	CNLU	China
CNLU_6_J	China_Luchuan	CNLU	China
CNLU_7_J	China_Luchuan	CNLU	China
CNLU_8_J	China_Luchuan	CNLU	China
CNLU_9_J	China_Luchuan	CNLU	China
CNLZ_1_J	China_LitangZang	CNLZ	China
CNLZ_10_J	China_LitangZang	CNLZ	China
CNLZ_11_J	China_LitangZang	CNLZ	China
CNLZ_12_J	China_LitangZang	CNLZ	China
CNLZ_13_J	China_LitangZang	CNLZ	China
CNLZ_14_J	China_LitangZang	CNLZ	China
CNLZ_15_J	China_LitangZang	CNLZ	China
CNLZ_16_J	China_LitangZang	CNLZ	China
CNLZ_2_J	China_LitangZang	CNLZ	China
CNLZ_3_J	China_LitangZang	CNLZ	China
CNLZ_4_J	China_LitangZang	CNLZ	China
CNLZ_5_J	China_LitangZang	CNLZ	China
CNLZ_6_J	China_LitangZang	CNLZ	China
CNLZ_7_J	China_LitangZang	CNLZ	China
CNLZ_8_J	China_LitangZang	CNLZ	China
CNLZ_9_J	China_LitangZang	CNLZ	China
CNMG_1_J	China_Mingguangxiaoer	CNMG	China
CNMG_10_J	China_Mingguangxiaoer	CNMG	China
CNMG_11_J	China_Mingguangxiaoer	CNMG	China
CNMG_12_J	China_Mingguangxiaoer	CNMG	China
CNMG_13_J	China_Mingguangxiaoer	CNMG	China
CNMG_14_J	China_Mingguangxiaoer	CNMG	China
CNMG_15_J	China_Mingguangxiaoer	CNMG	China
CNMG_16_J	China_Mingguangxiaoer	CNMG	China
CNMG_2_J	China_Mingguangxiaoer	CNMG	China
CNMG_3_J	China_Mingguangxiaoer	CNMG	China
CNMG_4_J	China_Mingguangxiaoer	CNMG	China
CNMG_5_J	China_Mingguangxiaoer	CNMG	China
CNMG_6_J	China_Mingguangxiaoer	CNMG	China
CNMG_7_J	China_Mingguangxiaoer	CNMG	China
CNMG_8_J	China_Mingguangxiaoer	CNMG	China
CNMG_9_J	China_Mingguangxiaoer	CNMG	China
CNML_1_J	China_MilinZang	CNML	China
CNML_10_J	China_MilinZang	CNML	China
CNML_11_J	China_MilinZang	CNML	China
CNML_12_J	China_MilinZang	CNML	China
CNML_13_J	China_MilinZang	CNML	China
CNML_14_J	China_MilinZang	CNML	China
CNML_15_J	China_MilinZang	CNML	China
CNML_16_J	China_MilinZang	CNML	China
CNML_2_J	China_MilinZang	CNML	China
CNML_3_J	China_MilinZang	CNML	China
CNML_4_J	China_MilinZang	CNML	China
CNML_5_J	China_MilinZang	CNML	China
CNML_6_J	China_MilinZang	CNML	China
CNML_7_J	China_MilinZang	CNML	China
CNML_8_J	China_MilinZang	CNML	China
CNML_9_J	China_MilinZang	CNML	China
CNMS_10_W	China_Meishan	CNMS	China
CNMS_11_W	China_Meishan	CNMS	China
CNMS_12_W	China_Meishan	CNMS	China
CNMS_13_W	China_Meishan	CNMS	China
CNMS_15_W	China_Meishan	CNMS	China
CNMS_16_W	China_Meishan	CNMS	China
CNMS_17_W	China_Meishan	CNMS	China
CNMS_18_W	China_Meishan	CNMS	China
CNMS_19_W	China_Meishan	CNMS	China
CNMS_20_W	China_Meishan	CNMS	China
CNMS_21_W	China_Meishan	CNMS	China
CNMS_25_W	China_Meishan	CNMS	China
CNMS_31_W	China_Meishan	CNMS	China
CNMS_33_W	China_Meishan	CNMS	China
CNMS_34_W	China_Meishan	CNMS	China
CNMS_37_W	China_Meishan	CNMS	China
CNMS_6_W	China_Meishan	CNMS	China
CNMS_7_W	China_Meishan	CNMS	China
CNMS_8_W	China_Meishan	CNMS	China
CNMS_9_W	China_Meishan	CNMS	China
CNMZ_1_J	China_Minzhu	CNMZ	China
CNMZ_10_J	China_Minzhu	CNMZ	China
CNMZ_11_J	China_Minzhu	CNMZ	China
CNMZ_12_J	China_Minzhu	CNMZ	China
CNMZ_13_J	China_Minzhu	CNMZ	China
CNMZ_14_J	China_Minzhu	CNMZ	China
CNMZ_15_J	China_Minzhu	CNMZ	China
CNMZ_16_J	China_Minzhu	CNMZ	China
CNMZ_17_J	China_Minzhu	CNMZ	China
CNMZ_18_J	China_Minzhu	CNMZ	China
CNMZ_19_J	China_Minzhu	CNMZ	China
CNMZ_2_J	China_Minzhu	CNMZ	China
CNMZ_20_J	China_Minzhu	CNMZ	China
CNMZ_3_J	China_Minzhu	CNMZ	China
CNMZ_4_J	China_Minzhu	CNMZ	China
CNMZ_5_J	China_Minzhu	CNMZ	China
CNMZ_6_J	China_Minzhu	CNMZ	China
CNMZ_7_J	China_Minzhu	CNMZ	China
CNMZ_8_J	China_Minzhu	CNMZ	China
CNMZ_9_J	China_Minzhu	CNMZ	China
CNNJ_1_J	China_Neijiang	CNNJ	China
CNNJ_10_J	China_Neijiang	CNNJ	China
CNNJ_11_J	China_Neijiang	CNNJ	China
CNNJ_12_J	China_Neijiang	CNNJ	China
CNNJ_13_J	China_Neijiang	CNNJ	China
CNNJ_14_J	China_Neijiang	CNNJ	China
CNNJ_15_J	China_Neijiang	CNNJ	China
CNNJ_16_J	China_Neijiang	CNNJ	China
CNNJ_2_J	China_Neijiang	CNNJ	China
CNNJ_3_J	China_Neijiang	CNNJ	China
CNNJ_4_J	China_Neijiang	CNNJ	China
CNNJ_5_J	China_Neijiang	CNNJ	China
CNNJ_6_J	China_Neijiang	CNNJ	China
CNNJ_7_J	China_Neijiang	CNNJ	China
CNNJ_8_J	China_Neijiang	CNNJ	China
CNNJ_9_J	China_Neijiang	CNNJ	China
CNRC_14_J	China_Rongchang	CNRC	China
CNRC_17_J	China_Rongchang	CNRC	China
CNRC_18_J	China_Rongchang	CNRC	China
CNRC_19_W	China_Rongchang	CNRC	China
CNRC_20_W	China_Rongchang	CNRC	China
CNRC_21_W	China_Rongchang	CNRC	China
CNRC_22_W	China_Rongchang	CNRC	China
CNRC_23_W	China_Rongchang	CNRC	China
CNRC_24_W	China_Rongchang	CNRC	China
CNRC_25_W	China_Rongchang	CNRC	China
CNRC_26_W	China_Rongchang	CNRC	China
CNRC_27_W	China_Rongchang	CNRC	China
CNRC_28_W	China_Rongchang	CNRC	China
CNRC_29_W	China_Rongchang	CNRC	China
CNRC_30_W	China_Rongchang	CNRC	China
CNRC_32_W	China_Rongchang	CNRC	China
CNRC_33_W	China_Rongchang	CNRC	China
CNRC_34_W	China_Rongchang	CNRC	China
CNRC_35_W	China_Rongchang	CNRC	China
CNRC_36_W	China_Rongchang	CNRC	China
CNST_1_J	China_Sutai	CNST	China
CNST_10_J	China_Sutai	CNST	China
CNST_11_J	China_Sutai	CNST	China
CNST_12_J	China_Sutai	CNST	China
CNST_13_J	China_Sutai	CNST	China
CNST_14_J	China_Sutai	CNST	China
CNST_15_J	China_Sutai	CNST	China
CNST_2_J	China_Sutai	CNST	China
CNST_3_J	China_Sutai	CNST	China
CNST_4_J	China_Sutai	CNST	China
CNST_5_J	China_Sutai	CNST	China
CNST_6_J	China_Sutai	CNST	China
CNST_7_J	China_Sutai	CNST	China
CNST_8_J	China_Sutai	CNST	China
CNST_9_J	China_Sutai	CNST	China
CNSZ_1_J	China_Shaziling	CNSZ	China
CNSZ_10_J	China_Shaziling	CNSZ	China
CNSZ_11_J	China_Shaziling	CNSZ	China
CNSZ_2_J	China_Shaziling	CNSZ	China
CNSZ_3_J	China_Shaziling	CNSZ	China
CNSZ_4_J	China_Shaziling	CNSZ	China
CNSZ_5_J	China_Shaziling	CNSZ	China
CNSZ_6_J	China_Shaziling	CNSZ	China
CNSZ_7_J	China_Shaziling	CNSZ	China
CNSZ_8_J	China_Shaziling	CNSZ	China
CNSZ_9_J	China_Shaziling	CNSZ	China
CNTC_1_J	China_Tongcheng	CNTC	China
CNTC_10_J	China_Tongcheng	CNTC	China
CNTC_11_J	China_Tongcheng	CNTC	China
CNTC_12_J	China_Tongcheng	CNTC	China
CNTC_13_J	China_Tongcheng	CNTC	China
CNTC_14_J	China_Tongcheng	CNTC	China
CNTC_15_J	China_Tongcheng	CNTC	China
CNTC_16_J	China_Tongcheng	CNTC	China
CNTC_2_J	China_Tongcheng	CNTC	China
CNTC_3_J	China_Tongcheng	CNTC	China
CNTC_4_J	China_Tongcheng	CNTC	China
CNTC_5_J	China_Tongcheng	CNTC	China
CNTC_6_J	China_Tongcheng	CNTC	China
CNTC_7_J	China_Tongcheng	CNTC	China
CNTC_8_J	China_Tongcheng	CNTC	China
CNTC_9_J	China_Tongcheng	CNTC	China
CNWB1_1_W	China_Southern_WildBoar	CNWB1	China
CNWB1_2_W	China_Southern_WildBoar	CNWB1	China
CNWB1_3_W	China_Southern_WildBoar	CNWB1	China
CNWB1_4_W	China_Southern_WildBoar	CNWB1	China
CNWB1_5_W	China_Southern_WildBoar	CNWB1	China
CNWB2_1_W	China_Northern_WildBoar	CNWB2	China
CNWB2_2_W	China_Northern_WildBoar	CNWB2	China
CNWB2_3_W	China_Northern_WildBoar	CNWB2	China
CNWB2_4_W	China_Northern_WildBoar	CNWB2	China
CNWB2_5_W	China_Northern_WildBoar	CNWB2	China
CNWB3_1_J	China_Nanchang_WildBoar	CNWB3	China
CNWB3_10_J	China_Nanchang_WildBoar	CNWB3	China
CNWB3_11_J	China_Nanchang_WildBoar	CNWB3	China
CNWB3_12_J	China_Nanchang_WildBoar	CNWB3	China
CNWB3_13_J	China_Nanchang_WildBoar	CNWB3	China
CNWB3_14_J	China_Nanchang_WildBoar	CNWB3	China
CNWB3_15_J	China_Nanchang_WildBoar	CNWB3	China
CNWB3_2_J	China_Nanchang_WildBoar	CNWB3	China
CNWB3_3_J	China_Nanchang_WildBoar	CNWB3	China
CNWB3_4_J	China_Nanchang_WildBoar	CNWB3	China
CNWB3_5_J	China_Nanchang_WildBoar	CNWB3	China
CNWB3_6_J	China_Nanchang_WildBoar	CNWB3	China
CNWB3_7_J	China_Nanchang_WildBoar	CNWB3	China
CNWB3_8_J	China_Nanchang_WildBoar	CNWB3	China
CNWB3_9_J	China_Nanchang_WildBoar	CNWB3	China
CNWB4_1_J	China_Shangyou_WildBoar	CNWB4	China
CNWB4_2_J	China_Shangyou_WildBoar	CNWB4	China
CNWB4_3_J	China_Shangyou_WildBoar	CNWB4	China
CNWB4_4_J	China_Shangyou_WildBoar	CNWB4	China
CNWN_1_W	China_Wannan_Spotted	CNWN	China
CNWN_10_W	China_Wannan_Spotted	CNWN	China
CNWN_11_W	China_Wannan_Spotted	CNWN	China
CNWN_12_W	China_Wannan_Spotted	CNWN	China
CNWN_13_W	China_Wannan_Spotted	CNWN	China
CNWN_14_W	China_Wannan_Spotted	CNWN	China
CNWN_15_W	China_Wannan_Spotted	CNWN	China
CNWN_16_W	China_Wannan_Spotted	CNWN	China
CNWN_17_W	China_Wannan_Spotted	CNWN	China
CNWN_18_W	China_Wannan_Spotted	CNWN	China
CNWN_2_W	China_Wannan_Spotted	CNWN	China
CNWN_3_W	China_Wannan_Spotted	CNWN	China
CNWN_4_W	China_Wannan_Spotted	CNWN	China
CNWN_5_W	China_Wannan_Spotted	CNWN	China
CNWN_6_W	China_Wannan_Spotted	CNWN	China
CNWN_7_W	China_Wannan_Spotted	CNWN	China
CNWN_8_W	China_Wannan_Spotted	CNWN	China
CNWN_9_W	China_Wannan_Spotted	CNWN	China
CNWZ_1_J	China_Wuzhishan	CNWZ	China
CNWZ_10_J	China_Wuzhishan	CNWZ	China
CNWZ_11_J	China_Wuzhishan	CNWZ	China
CNWZ_12_J	China_Wuzhishan	CNWZ	China
CNWZ_13_J	China_Wuzhishan	CNWZ	China
CNWZ_14_J	China_Wuzhishan	CNWZ	China
CNWZ_15_J	China_Wuzhishan	CNWZ	China
CNWZ_16_J	China_Wuzhishan	CNWZ	China
CNWZ_2_J	China_Wuzhishan	CNWZ	China
CNWZ_3_J	China_Wuzhishan	CNWZ	China
CNWZ_4_J	China_Wuzhishan	CNWZ	China
CNWZ_5_J	China_Wuzhishan	CNWZ	China
CNWZ_6_J	China_Wuzhishan	CNWZ	China
CNWZ_7_J	China_Wuzhishan	CNWZ	China
CNWZ_8_J	China_Wuzhishan	CNWZ	China
CNWZ_9_J	China_Wuzhishan	CNWZ	China
CNXI_1_W	China_Xiang	CNXI	China
CNXI_10_W	China_Xiang	CNXI	China
CNXI_11_W	China_Xiang	CNXI	China
CNXI_12_W	China_Xiang	CNXI	China
CNXI_13_W	China_Xiang	CNXI	China
CNXI_2_W	China_Xiang	CNXI	China
CNXI_3_W	China_Xiang	CNXI	China
CNXI_4_W	China_Xiang	CNXI	China
CNXI_5_W	China_Xiang	CNXI	China
CNXI_6_W	China_Xiang	CNXI	China
CNXI_7_W	China_Xiang	CNXI	China
CNXI_8_W	China_Xiang	CNXI	China
CNXI_9_W	China_Xiang	CNXI	China
CNXZ_1_J	China_GongbujiangdaZang	CNXZ	China
CNXZ_12_J	China_GongbujiangdaZang	CNXZ	China
CNXZ_13_J	China_GongbujiangdaZang	CNXZ	China
CNXZ_14_J	China_GongbujiangdaZang	CNXZ	China
CNXZ_17_J	China_GongbujiangdaZang	CNXZ	China
CNXZ_18_J	China_GongbujiangdaZang	CNXZ	China
CNXZ_2_J	China_GongbujiangdaZang	CNXZ	China
CNXZ_21_J	China_GongbujiangdaZang	CNXZ	China
CNXZ_22_J	China_GongbujiangdaZang	CNXZ	China
CNXZ_23_J	China_GongbujiangdaZang	CNXZ	China
CNXZ_24_J	China_GongbujiangdaZang	CNXZ	China
CNXZ_25_J	China_GongbujiangdaZang	CNXZ	China
CNXZ_28_J	China_GongbujiangdaZang	CNXZ	China
CNXZ_29_J	China_GongbujiangdaZang	CNXZ	China
CNXZ_3_J	China_GongbujiangdaZang	CNXZ	China
CNXZ_4_J	China_GongbujiangdaZang	CNXZ	China
CNXZ_5_J	China_GongbujiangdaZang	CNXZ	China
CNXZ_6_J	China_GongbujiangdaZang	CNXZ	China
CNXZ_7_J	China_GongbujiangdaZang	CNXZ	China
CNXZ_8_J	China_GongbujiangdaZang	CNXZ	China
CNZA_1_W	China_Zang	CNZA	China
CNZA_10_W	China_Zang	CNZA	China
CNZA_11_W	China_Zang	CNZA	China
CNZA_12_W	China_Zang	CNZA	China
CNZA_13_W	China_Zang	CNZA	China
CNZA_14_W	China_Zang	CNZA	China
CNZA_15_W	China_Zang	CNZA	China
CNZA_16_W	China_Zang	CNZA	China
CNZA_17_W	China_Zang	CNZA	China
CNZA_18_W	China_Zang	CNZA	China
CNZA_19_W	China_Zang	CNZA	China
CNZA_2_W	China_Zang	CNZA	China
CNZA_3_W	China_Zang	CNZA	China
CNZA_4_W	China_Zang	CNZA	China
CNZA_5_W	China_Zang	CNZA	China
CNZA_6_W	China_Zang	CNZA	China
CNZA_7_W	China_Zang	CNZA	China
CNZA_8_W	China_Zang	CNZA	China
CNZA_9_W	China_Zang	CNZA	China
CSLM_10_W	Crossbreed_LargeWhite-Meishan	CSLM	Netherlands
CSLM_12_W	Crossbreed_LargeWhite-Meishan	CSLM	Netherlands
CSLM_13_W	Crossbreed_LargeWhite-Meishan	CSLM	Netherlands
CSLM_14_W	Crossbreed_LargeWhite-Meishan	CSLM	Netherlands
CSLM_16_W	Crossbreed_LargeWhite-Meishan	CSLM	Netherlands
CSLM_18_W	Crossbreed_LargeWhite-Meishan	CSLM	Netherlands
CSLM_19_W	Crossbreed_LargeWhite-Meishan	CSLM	Netherlands
CSLM_2_W	Crossbreed_LargeWhite-Meishan	CSLM	Netherlands
CSLM_20_W	Crossbreed_LargeWhite-Meishan	CSLM	Netherlands
CSLM_21_W	Crossbreed_LargeWhite-Meishan	CSLM	Netherlands
CSLM_22_W	Crossbreed_LargeWhite-Meishan	CSLM	Netherlands
CSLM_23_W	Crossbreed_LargeWhite-Meishan	CSLM	Netherlands
CSLM_24_W	Crossbreed_LargeWhite-Meishan	CSLM	Netherlands
CSLM_3_W	Crossbreed_LargeWhite-Meishan	CSLM	Netherlands
CSLM_5_W	Crossbreed_LargeWhite-Meishan	CSLM	Netherlands
CSLM_6_W	Crossbreed_LargeWhite-Meishan	CSLM	Netherlands
CSLM_7_W	Crossbreed_LargeWhite-Meishan	CSLM	Netherlands
CSLM_8_W	Crossbreed_LargeWhite-Meishan	CSLM	Netherlands
CSLM_9_W	Crossbreed_LargeWhite-Meishan	CSLM	Netherlands
CSPL_1_W	Crossbreed_Pietrain-LargeWhite	CSPL	Netherlands
CSPL_10_W	Crossbreed_Pietrain-LargeWhite	CSPL	Netherlands
CSPL_11_W	Crossbreed_Pietrain-LargeWhite	CSPL	Netherlands
CSPL_12_W	Crossbreed_Pietrain-LargeWhite	CSPL	Netherlands
CSPL_13_W	Crossbreed_Pietrain-LargeWhite	CSPL	Netherlands
CSPL_14_W	Crossbreed_Pietrain-LargeWhite	CSPL	Netherlands
CSPL_15_W	Crossbreed_Pietrain-LargeWhite	CSPL	Netherlands
CSPL_16_W	Crossbreed_Pietrain-LargeWhite	CSPL	Netherlands
CSPL_17_W	Crossbreed_Pietrain-LargeWhite	CSPL	Netherlands
CSPL_18_W	Crossbreed_Pietrain-LargeWhite	CSPL	Netherlands
CSPL_19_W	Crossbreed_Pietrain-LargeWhite	CSPL	Netherlands
CSPL_2_W	Crossbreed_Pietrain-LargeWhite	CSPL	Netherlands
CSPL_20_W	Crossbreed_Pietrain-LargeWhite	CSPL	Netherlands
CSPL_3_W	Crossbreed_Pietrain-LargeWhite	CSPL	Netherlands
CSPL_4_W	Crossbreed_Pietrain-LargeWhite	CSPL	Netherlands
CSPL_5_W	Crossbreed_Pietrain-LargeWhite	CSPL	Netherlands
CSPL_6_W	Crossbreed_Pietrain-LargeWhite	CSPL	Netherlands
CSPL_7_W	Crossbreed_Pietrain-LargeWhite	CSPL	Netherlands
CSPL_8_W	Crossbreed_Pietrain-LargeWhite	CSPL	Netherlands
CSPL_9_W	Crossbreed_Pietrain-LargeWhite	CSPL	Netherlands
DUR1_1_W	Duroc	DUR1	Denmark
DUR1_10_W	Duroc	DUR1	Denmark
DUR1_11_W	Duroc	DUR1	Denmark
DUR1_12_W	Duroc	DUR1	Denmark
DUR1_13_W	Duroc	DUR1	Denmark
DUR1_14_W	Duroc	DUR1	Denmark
DUR1_15_W	Duroc	DUR1	Denmark
DUR1_16_W	Duroc	DUR1	Denmark
DUR1_17_W	Duroc	DUR1	Denmark
DUR1_18_W	Duroc	DUR1	Denmark
DUR1_19_W	Duroc	DUR1	Denmark
DUR1_2_W	Duroc	DUR1	Denmark
DUR1_3_W	Duroc	DUR1	Denmark
DUR1_4_W	Duroc	DUR1	Denmark
DUR1_5_W	Duroc	DUR1	Denmark
DUR1_6_W	Duroc	DUR1	Denmark
DUR1_7_W	Duroc	DUR1	Denmark
DUR1_8_W	Duroc	DUR1	Denmark
DUR1_9_W	Duroc	DUR1	Denmark
DUR2_10_W	Duroc	DUR2	USA
DUR2_11_W	Duroc	DUR2	USA
DUR2_15_W	Duroc	DUR2	USA
DUR2_18_W	Duroc	DUR2	USA
DUR2_24_W	Duroc	DUR2	USA
DUR2_26_W	Duroc	DUR2	USA
DUR2_28_W	Duroc	DUR2	USA
DUR2_29_W	Duroc	DUR2	USA
DUR2_3_W	Duroc	DUR2	USA
DUR2_30_W	Duroc	DUR2	USA
DUR2_31_W	Duroc	DUR2	USA
DUR2_35_W	Duroc	DUR2	USA
DUR2_38_W	Duroc	DUR2	USA
DUR2_39_W	Duroc	DUR2	USA
DUR2_4_W	Duroc	DUR2	USA
DUR2_40_W	Duroc	DUR2	USA
DUR2_41_W	Duroc	DUR2	USA
DUR2_42_W	Duroc	DUR2	USA
DUR2_43_W	Duroc	DUR2	USA
DUR2_8_W	Duroc	DUR2	USA
DUR3_12_W	Duroc	DUR3	Netherlands
DUR3_13_W	Duroc	DUR3	Netherlands
DUR3_14_W	Duroc	DUR3	Netherlands
DUR3_15_W	Duroc	DUR3	Netherlands
DUR3_16_W	Duroc	DUR3	Netherlands
DUR3_17_W	Duroc	DUR3	Netherlands
DUR3_18_W	Duroc	DUR3	Netherlands
DUR3_19_W	Duroc	DUR3	Netherlands
DUR3_20_W	Duroc	DUR3	Netherlands
DUR3_21_W	Duroc	DUR3	Netherlands
DUR3_22_W	Duroc	DUR3	Netherlands
DUR3_23_W	Duroc	DUR3	Netherlands
DUR3_24_W	Duroc	DUR3	Netherlands
DUR3_25_W	Duroc	DUR3	Netherlands
DUR3_26_W	Duroc	DUR3	Netherlands
DUR3_27_W	Duroc	DUR3	Netherlands
DUR3_28_W	Duroc	DUR3	Netherlands
DUR3_30_W	Duroc	DUR3	Netherlands
DUR3_32_W	Duroc	DUR3	Netherlands
DUR3_37_W	Duroc	DUR3	Netherlands
DUR4_10_J	Duroc	DUR4	China
DUR4_11_J	Duroc	DUR4	China
DUR4_12_J	Duroc	DUR4	China
DUR4_13_J	Duroc	DUR4	China
DUR4_14_J	Duroc	DUR4	China
DUR4_15_J	Duroc	DUR4	China
DUR4_16_J	Duroc	DUR4	China
DUR4_17_J	Duroc	DUR4	China
DUR4_19_J	Duroc	DUR4	China
DUR4_2_J	Duroc	DUR4	China
DUR4_20_J	Duroc	DUR4	China
DUR4_22_J	Duroc	DUR4	China
DUR4_24_J	Duroc	DUR4	China
DUR4_25_J	Duroc	DUR4	China
DUR4_3_J	Duroc	DUR4	China
DUR4_4_J	Duroc	DUR4	China
DUR4_5_J	Duroc	DUR4	China
DUR4_6_J	Duroc	DUR4	China
DUR4_7_J	Duroc	DUR4	China
DUR4_9_J	Duroc	DUR4	China
KPKO_1_W	Korea_Local	KPKO	Korea
KPKO_2_W	Korea_Local	KPKO	Korea
KPKO_3_W	Korea_Local	KPKO	Korea
KPKO_4_W	Korea_Local	KPKO	Korea
KPKO_5_W	Korea_Local	KPKO	Korea
KPKO_6_W	Korea_Local	KPKO	Korea
KPKO_7_W	Korea_Local	KPKO	Korea
KPKO_8_W	Korea_Local	KPKO	Korea
KPKO_9_W	Korea_Local	KPKO	Korea
LDR1_11_W	Landrace	LDR1	Denmark
LDR1_12_W	Landrace	LDR1	Denmark
LDR1_13_W	Landrace	LDR1	Denmark
LDR1_14_W	Landrace	LDR1	Denmark
LDR1_15_W	Landrace	LDR1	Denmark
LDR1_16_W	Landrace	LDR1	Denmark
LDR1_17_W	Landrace	LDR1	Denmark
LDR1_18_W	Landrace	LDR1	Denmark
LDR1_2_W	Landrace	LDR1	Denmark
LDR1_20_W	Landrace	LDR1	Denmark
LDR1_3_W	Landrace	LDR1	Denmark
LDR1_4_W	Landrace	LDR1	Denmark
LDR1_40_W	Landrace	LDR1	Denmark
LDR1_41_W	Landrace	LDR1	Denmark
LDR1_47_W	Landrace	LDR1	Denmark
LDR1_48_W	Landrace	LDR1	Denmark
LDR1_5_W	Landrace	LDR1	Denmark
LDR1_6_W	Landrace	LDR1	Denmark
LDR1_7_W	Landrace	LDR1	Denmark
LDR1_8_W	Landrace	LDR1	Denmark
LDR2_1_W	Landrace	LDR2	Norway
LDR2_10_W	Landrace	LDR2	Norway
LDR2_11_W	Landrace	LDR2	Norway
LDR2_12_W	Landrace	LDR2	Norway
LDR2_13_W	Landrace	LDR2	Norway
LDR2_14_W	Landrace	LDR2	Norway
LDR2_15_W	Landrace	LDR2	Norway
LDR2_2_W	Landrace	LDR2	Norway
LDR2_3_W	Landrace	LDR2	Norway
LDR2_4_W	Landrace	LDR2	Norway
LDR2_5_W	Landrace	LDR2	Norway
LDR2_6_W	Landrace	LDR2	Norway
LDR2_7_W	Landrace	LDR2	Norway
LDR2_8_W	Landrace	LDR2	Norway
LDR2_9_W	Landrace	LDR2	Norway
LDR3_1_W	Landrace	LDR3	Finland
LDR3_10_W	Landrace	LDR3	Finland
LDR3_11_W	Landrace	LDR3	Finland
LDR3_12_W	Landrace	LDR3	Finland
LDR3_13_W	Landrace	LDR3	Finland
LDR3_14_W	Landrace	LDR3	Finland
LDR3_15_W	Landrace	LDR3	Finland
LDR3_2_W	Landrace	LDR3	Finland
LDR3_3_W	Landrace	LDR3	Finland
LDR3_4_W	Landrace	LDR3	Finland
LDR3_5_W	Landrace	LDR3	Finland
LDR3_6_W	Landrace	LDR3	Finland
LDR3_7_W	Landrace	LDR3	Finland
LDR3_8_W	Landrace	LDR3	Finland
LDR3_9_W	Landrace	LDR3	Finland
LDR4_10_J	Landrace	LDR4	China
LDR4_11_J	Landrace	LDR4	China
LDR4_12_J	Landrace	LDR4	China
LDR4_13_J	Landrace	LDR4	China
LDR4_15_J	Landrace	LDR4	China
LDR4_16_J	Landrace	LDR4	China
LDR4_17_J	Landrace	LDR4	China
LDR4_18_J	Landrace	LDR4	China
LDR4_23_J	Landrace	LDR4	China
LDR4_24_J	Landrace	LDR4	China
LDR4_26_J	Landrace	LDR4	China
LDR4_29_J	Landrace	LDR4	China
LDR4_30_J	Landrace	LDR4	China
LDR4_31_J	Landrace	LDR4	China
LDR4_33_J	Landrace	LDR4	China
LDR4_35_J	Landrace	LDR4	China
LDR4_4_J	Landrace	LDR4	China
LDR4_6_J	Landrace	LDR4	China
LDR4_8_J	Landrace	LDR4	China
LDR4_9_J	Landrace	LDR4	China
LDR5_1_W	Landrace	LDR5	USA
LDR5_12_W	Landrace	LDR5	USA
LDR5_17_W	Landrace	LDR5	USA
LDR5_18_W	Landrace	LDR5	USA
LDR5_20_W	Landrace	LDR5	USA
LDR5_21_W	Landrace	LDR5	USA
LDR5_22_W	Landrace	LDR5	USA
LDR5_23_W	Landrace	LDR5	USA
LDR5_24_W	Landrace	LDR5	USA
LDR5_28_W	Landrace	LDR5	USA
LDR5_29_W	Landrace	LDR5	USA
LDR5_3_W	Landrace	LDR5	USA
LDR5_30_W	Landrace	LDR5	USA
LDR5_31_W	Landrace	LDR5	USA
LDR5_4_W	Landrace	LDR5	USA
LDR5_5_W	Landrace	LDR5	USA
LDR5_6_W	Landrace	LDR5	USA
LDR5_7_W	Landrace	LDR5	USA
LDR5_8_W	Landrace	LDR5	USA
LDR5_9_W	Landrace	LDR5	USA
LDR6_10_M	Landrace	LDR6	Spain
LDR6_11_M	Landrace	LDR6	Spain
LDR6_12_M	Landrace	LDR6	Spain
LDR6_13_M	Landrace	LDR6	Spain
LDR6_14_M	Landrace	LDR6	Spain
LDR6_15_M	Landrace	LDR6	Spain
LDR6_18_M	Landrace	LDR6	Spain
LDR6_19_M	Landrace	LDR6	Spain
LDR6_2_M	Landrace	LDR6	Spain
LDR6_20_M	Landrace	LDR6	Spain
LDR6_21_M	Landrace	LDR6	Spain
LDR6_22_M	Landrace	LDR6	Spain
LDR6_25_M	Landrace	LDR6	Spain
LDR6_26_M	Landrace	LDR6	Spain
LDR6_27_M	Landrace	LDR6	Spain
LDR6_28_M	Landrace	LDR6	Spain
LDR6_3_M	Landrace	LDR6	Spain
LDR6_4_M	Landrace	LDR6	Spain
LDR6_8_M	Landrace	LDR6	Spain
LDR6_9_M	Landrace	LDR6	Spain
LDR7_18_W	Landrace	LDR7	Netherlands
LDR7_19_W	Landrace	LDR7	Netherlands
LDR7_25_W	Landrace	LDR7	Netherlands
LDR7_26_W	Landrace	LDR7	Netherlands
LDR7_38_W	Landrace	LDR7	Netherlands
LDR7_39_W	Landrace	LDR7	Netherlands
LDR7_40_W	Landrace	LDR7	Netherlands
LDR7_41_W	Landrace	LDR7	Netherlands
LDR7_42_W	Landrace	LDR7	Netherlands
LDR7_43_W	Landrace	LDR7	Netherlands
LDR7_44_W	Landrace	LDR7	Netherlands
LDR7_45_W	Landrace	LDR7	Netherlands
LDR7_47_W	Landrace	LDR7	Netherlands
LDR7_50_W	Landrace	LDR7	Netherlands
LDR7_51_W	Landrace	LDR7	Netherlands
LDR7_52_W	Landrace	LDR7	Netherlands
LDR7_53_W	Landrace	LDR7	Netherlands
LDR7_54_W	Landrace	LDR7	Netherlands
LDR7_55_W	Landrace	LDR7	Netherlands
LDR7_56_W	Landrace	LDR7	Netherlands
LWT1_1_W	LargeWhite	LWT1	Denmark
LWT1_10_W	LargeWhite	LWT1	Denmark
LWT1_11_W	LargeWhite	LWT1	Denmark
LWT1_12_W	LargeWhite	LWT1	Denmark
LWT1_13_W	LargeWhite	LWT1	Denmark
LWT1_14_W	LargeWhite	LWT1	Denmark
LWT1_15_W	LargeWhite	LWT1	Denmark
LWT1_16_W	LargeWhite	LWT1	Denmark
LWT1_2_W	LargeWhite	LWT1	Denmark
LWT1_3_W	LargeWhite	LWT1	Denmark
LWT1_4_W	LargeWhite	LWT1	Denmark
LWT1_5_W	LargeWhite	LWT1	Denmark
LWT1_6_W	LargeWhite	LWT1	Denmark
LWT1_7_W	LargeWhite	LWT1	Denmark
LWT1_8_W	LargeWhite	LWT1	Denmark
LWT1_9_W	LargeWhite	LWT1	Denmark
LWT2_1_J	LargeWhite	LWT2	China
LWT2_15_J	LargeWhite	LWT2	China
LWT2_17_J	LargeWhite	LWT2	China
LWT2_18_J	LargeWhite	LWT2	China
LWT2_2_J	LargeWhite	LWT2	China
LWT2_23_J	LargeWhite	LWT2	China
LWT2_24_J	LargeWhite	LWT2	China
LWT2_25_J	LargeWhite	LWT2	China
LWT2_26_J	LargeWhite	LWT2	China
LWT2_27_J	LargeWhite	LWT2	China
LWT2_29_J	LargeWhite	LWT2	China
LWT2_3_J	LargeWhite	LWT2	China
LWT2_31_J	LargeWhite	LWT2	China
LWT2_32_J	LargeWhite	LWT2	China
LWT2_33_J	LargeWhite	LWT2	China
LWT2_35_J	LargeWhite	LWT2	China
LWT2_4_J	LargeWhite	LWT2	China
LWT2_5_J	LargeWhite	LWT2	China
LWT2_6_J	LargeWhite	LWT2	China
LWT2_7_J	LargeWhite	LWT2	China
LWT3_17_W	LargeWhite	LWT3	USA
LWT3_20_W	LargeWhite	LWT3	USA
LWT3_21_W	LargeWhite	LWT3	USA
LWT3_24_W	LargeWhite	LWT3	USA
LWT3_25_W	LargeWhite	LWT3	USA
LWT3_28_W	LargeWhite	LWT3	USA
LWT3_30_W	LargeWhite	LWT3	USA
LWT3_31_W	LargeWhite	LWT3	USA
LWT3_32_W	LargeWhite	LWT3	USA
LWT3_33_W	LargeWhite	LWT3	USA
LWT3_36_W	LargeWhite	LWT3	USA
LWT3_38_W	LargeWhite	LWT3	USA
LWT3_39_W	LargeWhite	LWT3	USA
LWT3_40_W	LargeWhite	LWT3	USA
LWT3_41_W	LargeWhite	LWT3	USA
LWT3_42_W	LargeWhite	LWT3	USA
LWT3_44_W	LargeWhite	LWT3	USA
LWT3_45_W	LargeWhite	LWT3	USA
LWT3_8_W	LargeWhite	LWT3	USA
LWT3_9_W	LargeWhite	LWT3	USA
LWT4_61_W	LargeWhite	LWT4	Netherlands
LWT4_62_W	LargeWhite	LWT4	Netherlands
LWT4_63_W	LargeWhite	LWT4	Netherlands
LWT4_64_W	LargeWhite	LWT4	Netherlands
LWT4_65_W	LargeWhite	LWT4	Netherlands
LWT4_67_W	LargeWhite	LWT4	Netherlands
LWT4_69_W	LargeWhite	LWT4	Netherlands
LWT4_70_W	LargeWhite	LWT4	Netherlands
LWT4_71_W	LargeWhite	LWT4	Netherlands
LWT4_72_W	LargeWhite	LWT4	Netherlands
LWT4_73_W	LargeWhite	LWT4	Netherlands
LWT4_74_W	LargeWhite	LWT4	Netherlands
LWT4_75_W	LargeWhite	LWT4	Netherlands
LWT4_76_W	LargeWhite	LWT4	Netherlands
LWT4_77_W	LargeWhite	LWT4	Netherlands
LWT4_79_W	LargeWhite	LWT4	Netherlands
LWT4_80_W	LargeWhite	LWT4	Netherlands
LWT4_82_W	LargeWhite	LWT4	Netherlands
LWT4_83_W	LargeWhite	LWT4	Netherlands
LWT4_84_W	LargeWhite	LWT4	Netherlands
PIT1_1_W	Pietrain	PIT1	USA
PIT1_10_W	Pietrain	PIT1	USA
PIT1_11_W	Pietrain	PIT1	USA
PIT1_12_W	Pietrain	PIT1	USA
PIT1_15_W	Pietrain	PIT1	USA
PIT1_19_W	Pietrain	PIT1	USA
PIT1_2_W	Pietrain	PIT1	USA
PIT1_20_W	Pietrain	PIT1	USA
PIT1_23_W	Pietrain	PIT1	USA
PIT1_24_W	Pietrain	PIT1	USA
PIT1_25_W	Pietrain	PIT1	USA
PIT1_26_W	Pietrain	PIT1	USA
PIT1_29_W	Pietrain	PIT1	USA
PIT1_3_W	Pietrain	PIT1	USA
PIT1_30_W	Pietrain	PIT1	USA
PIT1_32_W	Pietrain	PIT1	USA
PIT1_5_W	Pietrain	PIT1	USA
PIT1_6_W	Pietrain	PIT1	USA
PIT1_7_W	Pietrain	PIT1	USA
PIT1_8_W	Pietrain	PIT1	USA
PIT2_33_W	Pietrain	PIT2	Netherlands
PIT2_34_W	Pietrain	PIT2	Netherlands
PIT2_35_W	Pietrain	PIT2	Netherlands
PIT2_36_W	Pietrain	PIT2	Netherlands
PIT2_37_W	Pietrain	PIT2	Netherlands
PIT2_38_W	Pietrain	PIT2	Netherlands
PIT2_40_W	Pietrain	PIT2	Netherlands
PIT2_41_W	Pietrain	PIT2	Netherlands
PIT2_42_W	Pietrain	PIT2	Netherlands
PIT2_43_W	Pietrain	PIT2	Netherlands
PIT2_45_W	Pietrain	PIT2	Netherlands
PIT2_46_W	Pietrain	PIT2	Netherlands
PIT2_47_W	Pietrain	PIT2	Netherlands
PIT2_48_W	Pietrain	PIT2	Netherlands
PIT2_49_W	Pietrain	PIT2	Netherlands
PIT2_50_W	Pietrain	PIT2	Netherlands
PIT2_51_W	Pietrain	PIT2	Netherlands
PIT2_53_W	Pietrain	PIT2	Netherlands
PIT2_56_W	Pietrain	PIT2	Netherlands
PIT2_57_W	Pietrain	PIT2	Netherlands
PIT3_1_W	Pietrain	PIT3	Germany
PIT3_10_W	Pietrain	PIT3	Germany
PIT3_11_W	Pietrain	PIT3	Germany
PIT3_12_W	Pietrain	PIT3	Germany
PIT3_13_W	Pietrain	PIT3	Germany
PIT3_14_W	Pietrain	PIT3	Germany
PIT3_15_W	Pietrain	PIT3	Germany
PIT3_16_W	Pietrain	PIT3	Germany
PIT3_17_W	Pietrain	PIT3	Germany
PIT3_18_W	Pietrain	PIT3	Germany
PIT3_2_W	Pietrain	PIT3	Germany
PIT3_3_W	Pietrain	PIT3	Germany
PIT3_4_W	Pietrain	PIT3	Germany
PIT3_5_W	Pietrain	PIT3	Germany
PIT3_6_W	Pietrain	PIT3	Germany
PIT3_7_W	Pietrain	PIT3	Germany
PIT3_8_W	Pietrain	PIT3	Germany
PIT3_9_W	Pietrain	PIT3	Germany
THCD_1_W	Thailand_ChiangDao_ChiangMai	THCD	Thailand
THCD_2_W	Thailand_ChiangDao_ChiangMai	THCD	Thailand
THCD_3_W	Thailand_ChiangDao_ChiangMai	THCD	Thailand
THCD_4_W	Thailand_ChiangDao_ChiangMai	THCD	Thailand
THCD_5_W	Thailand_ChiangDao_ChiangMai	THCD	Thailand
THCD_6_W	Thailand_ChiangDao_ChiangMai	THCD	Thailand
THCD_7_W	Thailand_ChiangDao_ChiangMai	THCD	Thailand
THJT_1_W	Thailand_JhomThong_ChiangMai	THJT	Thailand
THJT_2_W	Thailand_JhomThong_ChiangMai	THJT	Thailand
THJT_3_W	Thailand_JhomThong_ChiangMai	THJT	Thailand
THJT_4_W	Thailand_JhomThong_ChiangMai	THJT	Thailand
THJT_5_W	Thailand_JhomThong_ChiangMai	THJT	Thailand
THJT_6_W	Thailand_JhomThong_ChiangMai	THJT	Thailand
THOK_1_W	Thailand_Om_Koi_ChiangMai	THOK	Thailand
THOK_2_W	Thailand_Om_Koi_ChiangMai	THOK	Thailand
THOK_3_W	Thailand_Om_Koi_ChiangMai	THOK	Thailand
THOK_4_W	Thailand_Om_Koi_ChiangMai	THOK	Thailand
THOK_5_W	Thailand_Om_Koi_ChiangMai	THOK	Thailand
THOK_6_W	Thailand_Om_Koi_ChiangMai	THOK	Thailand
UKBK_1_W	UK_Berkshire	UKBK	UK
UKBK_11_W	UK_Berkshire	UKBK	UK
UKBK_12_W	UK_Berkshire	UKBK	UK
UKBK_13_W	UK_Berkshire	UKBK	UK
UKBK_14_W	UK_Berkshire	UKBK	UK
UKBK_15_W	UK_Berkshire	UKBK	UK
UKBK_19_W	UK_Berkshire	UKBK	UK
UKBK_2_W	UK_Berkshire	UKBK	UK
UKBK_20_W	UK_Berkshire	UKBK	UK
UKBK_21_W	UK_Berkshire	UKBK	UK
UKBK_22_W	UK_Berkshire	UKBK	UK
UKBK_25_W	UK_Berkshire	UKBK	UK
UKBK_26_W	UK_Berkshire	UKBK	UK
UKBK_27_W	UK_Berkshire	UKBK	UK
UKBK_3_W	UK_Berkshire	UKBK	UK
UKBK_4_W	UK_Berkshire	UKBK	UK
UKBK_6_W	UK_Berkshire	UKBK	UK
UKBK_7_W	UK_Berkshire	UKBK	UK
UKBK_8_W	UK_Berkshire	UKBK	UK
UKBK_9_W	UK_Berkshire	UKBK	UK
UKHS_1_W	UK_Hampshire	UKHS	UK
UKHS_10_W	UK_Hampshire	UKHS	UK
UKHS_11_W	UK_Hampshire	UKHS	UK
UKHS_12_W	UK_Hampshire	UKHS	UK
UKHS_13_W	UK_Hampshire	UKHS	UK
UKHS_14_W	UK_Hampshire	UKHS	UK
UKHS_15_W	UK_Hampshire	UKHS	UK
UKHS_16_W	UK_Hampshire	UKHS	UK
UKHS_17_W	UK_Hampshire	UKHS	UK
UKHS_18_W	UK_Hampshire	UKHS	UK
UKHS_2_W	UK_Hampshire	UKHS	UK
UKHS_23_W	UK_Hampshire	UKHS	UK
UKHS_24_W	UK_Hampshire	UKHS	UK
UKHS_3_W	UK_Hampshire	UKHS	UK
UKHS_4_W	UK_Hampshire	UKHS	UK
UKHS_5_W	UK_Hampshire	UKHS	UK
UKHS_6_W	UK_Hampshire	UKHS	UK
UKHS_7_W	UK_Hampshire	UKHS	UK
UKHS_8_W	UK_Hampshire	UKHS	UK
UKHS_9_W	UK_Hampshire	UKHS	UK
UKMW_10_W	UK_Middle_White	UKMW	UK
UKMW_11_W	UK_Middle_White	UKMW	UK
UKMW_12_W	UK_Middle_White	UKMW	UK
UKMW_13_W	UK_Middle_White	UKMW	UK
UKMW_14_W	UK_Middle_White	UKMW	UK
UKMW_15_W	UK_Middle_White	UKMW	UK
UKMW_16_W	UK_Middle_White	UKMW	UK
UKMW_17_W	UK_Middle_White	UKMW	UK
UKMW_20_W	UK_Middle_White	UKMW	UK
UKMW_21_W	UK_Middle_White	UKMW	UK
UKMW_22_W	UK_Middle_White	UKMW	UK
UKMW_23_W	UK_Middle_White	UKMW	UK
UKMW_26_W	UK_Middle_White	UKMW	UK
UKMW_27_W	UK_Middle_White	UKMW	UK
UKMW_4_W	UK_Middle_White	UKMW	UK
UKMW_5_W	UK_Middle_White	UKMW	UK
UKMW_6_W	UK_Middle_White	UKMW	UK
UKMW_7_W	UK_Middle_White	UKMW	UK
UKMW_8_W	UK_Middle_White	UKMW	UK
UKMW_9_W	UK_Middle_White	UKMW	UK
USBK_15_W	USA_Berkshire	USBK	USA
USBK_16_W	USA_Berkshire	USBK	USA
USBK_18_W	USA_Berkshire	USBK	USA
USBK_2_W	USA_Berkshire	USBK	USA
USBK_20_W	USA_Berkshire	USBK	USA
USBK_21_W	USA_Berkshire	USBK	USA
USBK_22_W	USA_Berkshire	USBK	USA
USBK_28_W	USA_Berkshire	USBK	USA
USBK_30_W	USA_Berkshire	USBK	USA
USBK_31_W	USA_Berkshire	USBK	USA
USBK_34_W	USA_Berkshire	USBK	USA
USBK_35_W	USA_Berkshire	USBK	USA
USBK_36_W	USA_Berkshire	USBK	USA
USBK_37_W	USA_Berkshire	USBK	USA
USBK_39_W	USA_Berkshire	USBK	USA
USBK_40_W	USA_Berkshire	USBK	USA
USBK_42_W	USA_Berkshire	USBK	USA
USBK_7_W	USA_Berkshire	USBK	USA
USBK_8_W	USA_Berkshire	USBK	USA
USBK_9_W	USA_Berkshire	USBK	USA
USHS_11_W	USA_Hampshire	USHS	USA
USHS_12_W	USA_Hampshire	USHS	USA
USHS_15_W	USA_Hampshire	USHS	USA
USHS_16_W	USA_Hampshire	USHS	USA
USHS_18_W	USA_Hampshire	USHS	USA
USHS_19_W	USA_Hampshire	USHS	USA
USHS_2_W	USA_Hampshire	USHS	USA
USHS_20_W	USA_Hampshire	USHS	USA
USHS_21_W	USA_Hampshire	USHS	USA
USHS_23_W	USA_Hampshire	USHS	USA
USHS_24_W	USA_Hampshire	USHS	USA
USHS_26_W	USA_Hampshire	USHS	USA
USHS_27_W	USA_Hampshire	USHS	USA
USHS_28_W	USA_Hampshire	USHS	USA
USHS_30_W	USA_Hampshire	USHS	USA
USHS_32_W	USA_Hampshire	USHS	USA
USHS_34_W	USA_Hampshire	USHS	USA
USHS_35_W	USA_Hampshire	USHS	USA
USHS_37_W	USA_Hampshire	USHS	USA
USHS_38_W	USA_Hampshire	USHS	USA
USPC_1_W	USA_Poland_China	USPC	USA
USPC_2_W	USA_Poland_China	USPC	USA
USPC_3_W	USA_Poland_China	USPC	USA
USPC_4_W	USA_Poland_China	USPC	USA
USPC_5_W	USA_Poland_China	USPC	USA
USPC_6_W	USA_Poland_China	USPC	USA
RUMS_1_J	Russia_Minisibs	RUMS	Russia
RUMS_10_J	Russia_Minisibs	RUMS	Russia
RUMS_11_J	Russia_Minisibs	RUMS	Russia
RUMS_12_J	Russia_Minisibs	RUMS	Russia
RUMS_13_J	Russia_Minisibs	RUMS	Russia
RUMS_14_J	Russia_Minisibs	RUMS	Russia
RUMS_2_J	Russia_Minisibs	RUMS	Russia
RUMS_3_J	Russia_Minisibs	RUMS	Russia
RUMS_4_J	Russia_Minisibs	RUMS	Russia
RUMS_5_J	Russia_Minisibs	RUMS	Russia
RUMS_6_J	Russia_Minisibs	RUMS	Russia
RUMS_7_J	Russia_Minisibs	RUMS	Russia
RUMS_8_J	Russia_Minisibs	RUMS	Russia
RUMS_9_J	Russia_Minisibs	RUMS	Russia

## Sheet: Table S2
Table S2. Information of 969 samples from 61 pig populations.
Sample Name	Breed Name	Breed Abbreviation	Country
CNBM_1_J	China_Bamei	CNBM	China
CNBM_10_J	China_Bamei	CNBM	China
CNBM_11_J	China_Bamei	CNBM	China
CNBM_12_J	China_Bamei	CNBM	China
CNBM_13_J	China_Bamei	CNBM	China
CNBM_14_J	China_Bamei	CNBM	China
CNBM_15_J	China_Bamei	CNBM	China
CNBM_16_J	China_Bamei	CNBM	China
CNBM_2_J	China_Bamei	CNBM	China
CNBM_3_J	China_Bamei	CNBM	China
CNBM_4_J	China_Bamei	CNBM	China
CNBM_5_J	China_Bamei	CNBM	China
CNBM_6_J	China_Bamei	CNBM	China
CNBM_7_J	China_Bamei	CNBM	China
CNBM_8_J	China_Bamei	CNBM	China
CNBM_9_J	China_Bamei	CNBM	China
CNDN_10_J	China_Diannanxiaoer	CNDN	China
CNDN_11_J	China_Diannanxiaoer	CNDN	China
CNDN_13_J	China_Diannanxiaoer	CNDN	China
CNDN_14_J	China_Diannanxiaoer	CNDN	China
CNDN_15_J	China_Diannanxiaoer	CNDN	China
CNDN_2_J	China_Diannanxiaoer	CNDN	China
CNDN_3_J	China_Diannanxiaoer	CNDN	China
CNDN_4_J	China_Diannanxiaoer	CNDN	China
CNDN_5_J	China_Diannanxiaoer	CNDN	China
CNDN_6_J	China_Diannanxiaoer	CNDN	China
CNDN_7_J	China_Diannanxiaoer	CNDN	China
CNDN_8_J	China_Diannanxiaoer	CNDN	China
CNDN_9_J	China_Diannanxiaoer	CNDN	China
CNDQ_1_J	China_DiqingZang	CNDQ	China
CNDQ_10_J	China_DiqingZang	CNDQ	China
CNDQ_11_J	China_DiqingZang	CNDQ	China
CNDQ_12_J	China_DiqingZang	CNDQ	China
CNDQ_13_J	China_DiqingZang	CNDQ	China
CNDQ_14_J	China_DiqingZang	CNDQ	China
CNDQ_15_J	China_DiqingZang	CNDQ	China
CNDQ_16_J	China_DiqingZang	CNDQ	China
CNDQ_17_J	China_DiqingZang	CNDQ	China
CNDQ_18_J	China_DiqingZang	CNDQ	China
CNDQ_19_J	China_DiqingZang	CNDQ	China
CNDQ_2_J	China_DiqingZang	CNDQ	China
CNDQ_3_J	China_DiqingZang	CNDQ	China
CNDQ_4_J	China_DiqingZang	CNDQ	China
CNDQ_5_J	China_DiqingZang	CNDQ	China
CNDQ_6_J	China_DiqingZang	CNDQ	China
CNDQ_7_J	China_DiqingZang	CNDQ	China
CNDQ_8_J	China_DiqingZang	CNDQ	China
CNDQ_9_J	China_DiqingZang	CNDQ	China
CNDS_1_J	China_Dongshan	CNDS	China
CNDS_10_J	China_Dongshan	CNDS	China
CNDS_11_J	China_Dongshan	CNDS	China
CNDS_12_J	China_Dongshan	CNDS	China
CNDS_13_J	China_Dongshan	CNDS	China
CNDS_14_J	China_Dongshan	CNDS	China
CNDS_15_J	China_Dongshan	CNDS	China
CNDS_2_J	China_Dongshan	CNDS	China
CNDS_3_J	China_Dongshan	CNDS	China
CNDS_4_J	China_Dongshan	CNDS	China
CNDS_5_J	China_Dongshan	CNDS	China
CNDS_6_J	China_Dongshan	CNDS	China
CNDS_7_J	China_Dongshan	CNDS	China
CNDS_8_J	China_Dongshan	CNDS	China
CNDS_9_J	China_Dongshan	CNDS	China
CNGS_1_J	China_GansuZang	CNGS	China
CNGS_10_J	China_GansuZang	CNGS	China
CNGS_11_J	China_GansuZang	CNGS	China
CNGS_12_J	China_GansuZang	CNGS	China
CNGS_13_J	China_GansuZang	CNGS	China
CNGS_14_J	China_GansuZang	CNGS	China
CNGS_15_J	China_GansuZang	CNGS	China
CNGS_16_J	China_GansuZang	CNGS	China
CNGS_17_J	China_GansuZang	CNGS	China
CNGS_18_J	China_GansuZang	CNGS	China
CNGS_19_J	China_GansuZang	CNGS	China
CNGS_2_J	China_GansuZang	CNGS	China
CNGS_20_J	China_GansuZang	CNGS	China
CNGS_21_J	China_GansuZang	CNGS	China
CNGS_3_J	China_GansuZang	CNGS	China
CNGS_5_J	China_GansuZang	CNGS	China
CNGS_6_J	China_GansuZang	CNGS	China
CNGS_7_J	China_GansuZang	CNGS	China
CNGS_8_J	China_GansuZang	CNGS	China
CNGS_9_J	China_GansuZang	CNGS	China
CNGU_1_W	China_Guanling	CNGU	China
CNGU_10_W	China_Guanling	CNGU	China
CNGU_11_W	China_Guanling	CNGU	China
CNGU_12_W	China_Guanling	CNGU	China
CNGU_13_W	China_Guanling	CNGU	China
CNGU_14_W	China_Guanling	CNGU	China
CNGU_15_W	China_Guanling	CNGU	China
CNGU_16_W	China_Guanling	CNGU	China
CNGU_17_W	China_Guanling	CNGU	China
CNGU_18_W	China_Guanling	CNGU	China
CNGU_2_W	China_Guanling	CNGU	China
CNGU_3_W	China_Guanling	CNGU	China
CNGU_4_W	China_Guanling	CNGU	China
CNGU_5_W	China_Guanling	CNGU	China
CNGU_6_W	China_Guanling	CNGU	China
CNGU_7_W	China_Guanling	CNGU	China
CNGU_8_W	China_Guanling	CNGU	China
CNGU_9_W	China_Guanling	CNGU	China
CNGX_1_J	China_Ganxiliangtouwu	CNGX	China
CNGX_10_J	China_Ganxiliangtouwu	CNGX	China
CNGX_11_J	China_Ganxiliangtouwu	CNGX	China
CNGX_12_J	China_Ganxiliangtouwu	CNGX	China
CNGX_13_J	China_Ganxiliangtouwu	CNGX	China
CNGX_2_J	China_Ganxiliangtouwu	CNGX	China
CNGX_3_J	China_Ganxiliangtouwu	CNGX	China
CNGX_4_J	China_Ganxiliangtouwu	CNGX	China
CNGX_5_J	China_Ganxiliangtouwu	CNGX	China
CNGX_6_J	China_Ganxiliangtouwu	CNGX	China
CNGX_7_J	China_Ganxiliangtouwu	CNGX	China
CNGX_8_J	China_Ganxiliangtouwu	CNGX	China
CNGX_9_J	China_Ganxiliangtouwu	CNGX	China
CNHT_1_J	China_Hetaodaer	CNHT	China
CNHT_10_J	China_Hetaodaer	CNHT	China
CNHT_11_J	China_Hetaodaer	CNHT	China
CNHT_12_J	China_Hetaodaer	CNHT	China
CNHT_13_J	China_Hetaodaer	CNHT	China
CNHT_14_J	China_Hetaodaer	CNHT	China
CNHT_15_J	China_Hetaodaer	CNHT	China
CNHT_16_J	China_Hetaodaer	CNHT	China
CNHT_2_J	China_Hetaodaer	CNHT	China
CNHT_3_J	China_Hetaodaer	CNHT	China
CNHT_4_J	China_Hetaodaer	CNHT	China
CNHT_5_J	China_Hetaodaer	CNHT	China
CNHT_6_J	China_Hetaodaer	CNHT	China
CNHT_7_J	China_Hetaodaer	CNHT	China
CNHT_8_J	China_Hetaodaer	CNHT	China
CNHT_9_J	China_Hetaodaer	CNHT	China
CNJQ_1_W	China_Jiangquhai	CNJQ	China
CNJQ_10_W	China_Jiangquhai	CNJQ	China
CNJQ_11_W	China_Jiangquhai	CNJQ	China
CNJQ_2_W	China_Jiangquhai	CNJQ	China
CNJQ_3_W	China_Jiangquhai	CNJQ	China
CNJQ_4_W	China_Jiangquhai	CNJQ	China
CNJQ_5_W	China_Jiangquhai	CNJQ	China
CNJQ_6_W	China_Jiangquhai	CNJQ	China
CNJQ_7_W	China_Jiangquhai	CNJQ	China
CNJQ_8_W	China_Jiangquhai	CNJQ	China
CNJQ_9_W	China_Jiangquhai	CNJQ	China
CNKL_1_J	China_Kele	CNKL	China
CNKL_10_J	China_Kele	CNKL	China
CNKL_2_J	China_Kele	CNKL	China
CNKL_3_J	China_Kele	CNKL	China
CNKL_4_J	China_Kele	CNKL	China
CNKL_5_J	China_Kele	CNKL	China
CNKL_6_J	China_Kele	CNKL	China
CNKL_7_J	China_Kele	CNKL	China
CNKL_8_J	China_Kele	CNKL	China
CNKL_9_J	China_Kele	CNKL	China
CNLA_1_J	China_Leanhua	CNLA	China
CNLA_10_J	China_Leanhua	CNLA	China
CNLA_11_J	China_Leanhua	CNLA	China
CNLA_12_J	China_Leanhua	CNLA	China
CNLA_13_J	China_Leanhua	CNLA	China
CNLA_14_J	China_Leanhua	CNLA	China
CNLA_15_J	China_Leanhua	CNLA	China
CNLA_16_J	China_Leanhua	CNLA	China
CNLA_17_J	China_Leanhua	CNLA	China
CNLA_2_J	China_Leanhua	CNLA	China
CNLA_3_J	China_Leanhua	CNLA	China
CNLA_4_J	China_Leanhua	CNLA	China
CNLA_5_J	China_Leanhua	CNLA	China
CNLA_6_J	China_Leanhua	CNLA	China
CNLA_7_J	China_Leanhua	CNLA	China
CNLA_8_J	China_Leanhua	CNLA	China
CNLA_9_J	China_Leanhua	CNLA	China
CNLC_1_J	China_Lichahei	CNLC	China
CNLC_10_J	China_Lichahei	CNLC	China
CNLC_11_J	China_Lichahei	CNLC	China
CNLC_12_J	China_Lichahei	CNLC	China
CNLC_13_J	China_Lichahei	CNLC	China
CNLC_14_J	China_Lichahei	CNLC	China
CNLC_2_J	China_Lichahei	CNLC	China
CNLC_3_J	China_Lichahei	CNLC	China
CNLC_4_J	China_Lichahei	CNLC	China
CNLC_5_J	China_Lichahei	CNLC	China
CNLC_6_J	China_Lichahei	CNLC	China
CNLC_7_J	China_Lichahei	CNLC	China
CNLC_8_J	China_Lichahei	CNLC	China
CNLC_9_J	China_Lichahei	CNLC	China
CNLH_1_J	China_Laiwuhei	CNLH	China
CNLH_10_J	China_Laiwuhei	CNLH	China
CNLH_11_J	China_Laiwuhei	CNLH	China
CNLH_12_J	China_Laiwuhei	CNLH	China
CNLH_13_J	China_Laiwuhei	CNLH	China
CNLH_14_J	China_Laiwuhei	CNLH	China
CNLH_15_J	China_Laiwuhei	CNLH	China
CNLH_16_J	China_Laiwuhei	CNLH	China
CNLH_17_J	China_Laiwuhei	CNLH	China
CNLH_18_J	China_Laiwuhei	CNLH	China
CNLH_2_J	China_Laiwuhei	CNLH	China
CNLH_3_J	China_Laiwuhei	CNLH	China
CNLH_4_J	China_Laiwuhei	CNLH	China
CNLH_5_J	China_Laiwuhei	CNLH	China
CNLH_6_J	China_Laiwuhei	CNLH	China
CNLH_7_J	China_Laiwuhei	CNLH	China
CNLH_8_J	China_Laiwuhei	CNLH	China
CNLH_9_J	China_Laiwuhei	CNLH	China
CNLP_1_W	China_Leping_Spotted	CNLP	China
CNLP_10_W	China_Leping_Spotted	CNLP	China
CNLP_11_W	China_Leping_Spotted	CNLP	China
CNLP_12_W	China_Leping_Spotted	CNLP	China
CNLP_13_W	China_Leping_Spotted	CNLP	China
CNLP_14_W	China_Leping_Spotted	CNLP	China
CNLP_15_W	China_Leping_Spotted	CNLP	China
CNLP_16_W	China_Leping_Spotted	CNLP	China
CNLP_17_W	China_Leping_Spotted	CNLP	China
CNLP_18_W	China_Leping_Spotted	CNLP	China
CNLP_19_W	China_Leping_Spotted	CNLP	China
CNLP_2_W	China_Leping_Spotted	CNLP	China
CNLP_20_W	China_Leping_Spotted	CNLP	China
CNLP_3_W	China_Leping_Spotted	CNLP	China
CNLP_4_W	China_Leping_Spotted	CNLP	China
CNLP_5_W	China_Leping_Spotted	CNLP	China
CNLP_6_W	China_Leping_Spotted	CNLP	China
CNLP_7_W	China_Leping_Spotted	CNLP	China
CNLP_8_W	China_Leping_Spotted	CNLP	China
CNLP_9_W	China_Leping_Spotted	CNLP	China
CNLT_1_W	China_Lantang	CNLT	China
CNLT_10_W	China_Lantang	CNLT	China
CNLT_11_W	China_Lantang	CNLT	China
CNLT_12_W	China_Lantang	CNLT	China
CNLT_13_W	China_Lantang	CNLT	China
CNLT_14_W	China_Lantang	CNLT	China
CNLT_15_W	China_Lantang	CNLT	China
CNLT_16_W	China_Lantang	CNLT	China
CNLT_17_W	China_Lantang	CNLT	China
CNLT_18_W	China_Lantang	CNLT	China
CNLT_19_W	China_Lantang	CNLT	China
CNLT_2_W	China_Lantang	CNLT	China
CNLT_20_W	China_Lantang	CNLT	China
CNLT_3_W	China_Lantang	CNLT	China
CNLT_4_W	China_Lantang	CNLT	China
CNLT_5_W	China_Lantang	CNLT	China
CNLT_6_W	China_Lantang	CNLT	China
CNLT_7_W	China_Lantang	CNLT	China
CNLT_8_W	China_Lantang	CNLT	China
CNLT_9_W	China_Lantang	CNLT	China
CNLZ_1_J	China_LitangZang	CNLZ	China
CNLZ_10_J	China_LitangZang	CNLZ	China
CNLZ_11_J	China_LitangZang	CNLZ	China
CNLZ_12_J	China_LitangZang	CNLZ	China
CNLZ_13_J	China_LitangZang	CNLZ	China
CNLZ_14_J	China_LitangZang	CNLZ	China
CNLZ_15_J	China_LitangZang	CNLZ	China
CNLZ_16_J	China_LitangZang	CNLZ	China
CNLZ_2_J	China_LitangZang	CNLZ	China
CNLZ_3_J	China_LitangZang	CNLZ	China
CNLZ_4_J	China_LitangZang	CNLZ	China
CNLZ_5_J	China_LitangZang	CNLZ	China
CNLZ_6_J	China_LitangZang	CNLZ	China
CNLZ_7_J	China_LitangZang	CNLZ	China
CNLZ_8_J	China_LitangZang	CNLZ	China
CNLZ_9_J	China_LitangZang	CNLZ	China
CNMG_1_J	China_Mingguangxiaoer	CNMG	China
CNMG_10_J	China_Mingguangxiaoer	CNMG	China
CNMG_11_J	China_Mingguangxiaoer	CNMG	China
CNMG_12_J	China_Mingguangxiaoer	CNMG	China
CNMG_13_J	China_Mingguangxiaoer	CNMG	China
CNMG_14_J	China_Mingguangxiaoer	CNMG	China
CNMG_15_J	China_Mingguangxiaoer	CNMG	China
CNMG_16_J	China_Mingguangxiaoer	CNMG	China
CNMG_2_J	China_Mingguangxiaoer	CNMG	China
CNMG_3_J	China_Mingguangxiaoer	CNMG	China
CNMG_4_J	China_Mingguangxiaoer	CNMG	China
CNMG_5_J	China_Mingguangxiaoer	CNMG	China
CNMG_6_J	China_Mingguangxiaoer	CNMG	China
CNMG_7_J	China_Mingguangxiaoer	CNMG	China
CNMG_8_J	China_Mingguangxiaoer	CNMG	China
CNMG_9_J	China_Mingguangxiaoer	CNMG	China
CNML_1_J	China_MilinZang	CNML	China
CNML_10_J	China_MilinZang	CNML	China
CNML_11_J	China_MilinZang	CNML	China
CNML_12_J	China_MilinZang	CNML	China
CNML_13_J	China_MilinZang	CNML	China
CNML_14_J	China_MilinZang	CNML	China
CNML_15_J	China_MilinZang	CNML	China
CNML_16_J	China_MilinZang	CNML	China
CNML_2_J	China_MilinZang	CNML	China
CNML_3_J	China_MilinZang	CNML	China
CNML_4_J	China_MilinZang	CNML	China
CNML_5_J	China_MilinZang	CNML	China
CNML_6_J	China_MilinZang	CNML	China
CNML_7_J	China_MilinZang	CNML	China
CNML_8_J	China_MilinZang	CNML	China
CNML_9_J	China_MilinZang	CNML	China
CNMZ_1_J	China_Minzhu	CNMZ	China
CNMZ_10_J	China_Minzhu	CNMZ	China
CNMZ_11_J	China_Minzhu	CNMZ	China
CNMZ_12_J	China_Minzhu	CNMZ	China
CNMZ_13_J	China_Minzhu	CNMZ	China
CNMZ_14_J	China_Minzhu	CNMZ	China
CNMZ_15_J	China_Minzhu	CNMZ	China
CNMZ_16_J	China_Minzhu	CNMZ	China
CNMZ_17_J	China_Minzhu	CNMZ	China
CNMZ_18_J	China_Minzhu	CNMZ	China
CNMZ_19_J	China_Minzhu	CNMZ	China
CNMZ_2_J	China_Minzhu	CNMZ	China
CNMZ_20_J	China_Minzhu	CNMZ	China
CNMZ_3_J	China_Minzhu	CNMZ	China
CNMZ_4_J	China_Minzhu	CNMZ	China
CNMZ_5_J	China_Minzhu	CNMZ	China
CNMZ_6_J	China_Minzhu	CNMZ	China
CNMZ_7_J	China_Minzhu	CNMZ	China
CNMZ_8_J	China_Minzhu	CNMZ	China
CNMZ_9_J	China_Minzhu	CNMZ	China
CNNJ_1_J	China_Neijiang	CNNJ	China
CNNJ_10_J	China_Neijiang	CNNJ	China
CNNJ_11_J	China_Neijiang	CNNJ	China
CNNJ_12_J	China_Neijiang	CNNJ	China
CNNJ_13_J	China_Neijiang	CNNJ	China
CNNJ_14_J	China_Neijiang	CNNJ	China
CNNJ_15_J	China_Neijiang	CNNJ	China
CNNJ_16_J	China_Neijiang	CNNJ	China
CNNJ_2_J	China_Neijiang	CNNJ	China
CNNJ_3_J	China_Neijiang	CNNJ	China
CNNJ_4_J	China_Neijiang	CNNJ	China
CNNJ_5_J	China_Neijiang	CNNJ	China
CNNJ_6_J	China_Neijiang	CNNJ	China
CNNJ_7_J	China_Neijiang	CNNJ	China
CNNJ_8_J	China_Neijiang	CNNJ	China
CNNJ_9_J	China_Neijiang	CNNJ	China
CNRC_14_J	China_Rongchang	CNRC	China
CNRC_17_J	China_Rongchang	CNRC	China
CNRC_18_J	China_Rongchang	CNRC	China
CNRC_19_W	China_Rongchang	CNRC	China
CNRC_20_W	China_Rongchang	CNRC	China
CNRC_21_W	China_Rongchang	CNRC	China
CNRC_22_W	China_Rongchang	CNRC	China
CNRC_23_W	China_Rongchang	CNRC	China
CNRC_24_W	China_Rongchang	CNRC	China
CNRC_25_W	China_Rongchang	CNRC	China
CNRC_26_W	China_Rongchang	CNRC	China
CNRC_27_W	China_Rongchang	CNRC	China
CNRC_28_W	China_Rongchang	CNRC	China
CNRC_29_W	China_Rongchang	CNRC	China
CNRC_30_W	China_Rongchang	CNRC	China
CNRC_32_W	China_Rongchang	CNRC	China
CNRC_33_W	China_Rongchang	CNRC	China
CNRC_34_W	China_Rongchang	CNRC	China
CNRC_35_W	China_Rongchang	CNRC	China
CNRC_36_W	China_Rongchang	CNRC	China
CNST_1_J	China_Sutai	CNST	China
CNST_10_J	China_Sutai	CNST	China
CNST_11_J	China_Sutai	CNST	China
CNST_12_J	China_Sutai	CNST	China
CNST_13_J	China_Sutai	CNST	China
CNST_14_J	China_Sutai	CNST	China
CNST_15_J	China_Sutai	CNST	China
CNST_2_J	China_Sutai	CNST	China
CNST_3_J	China_Sutai	CNST	China
CNST_4_J	China_Sutai	CNST	China
CNST_5_J	China_Sutai	CNST	China
CNST_7_J	China_Sutai	CNST	China
CNST_8_J	China_Sutai	CNST	China
CNST_9_J	China_Sutai	CNST	China
CNSZ_1_J	China_Shaziling	CNSZ	China
CNSZ_10_J	China_Shaziling	CNSZ	China
CNSZ_11_J	China_Shaziling	CNSZ	China
CNSZ_2_J	China_Shaziling	CNSZ	China
CNSZ_3_J	China_Shaziling	CNSZ	China
CNSZ_4_J	China_Shaziling	CNSZ	China
CNSZ_5_J	China_Shaziling	CNSZ	China
CNSZ_6_J	China_Shaziling	CNSZ	China
CNSZ_7_J	China_Shaziling	CNSZ	China
CNSZ_8_J	China_Shaziling	CNSZ	China
CNSZ_9_J	China_Shaziling	CNSZ	China
CNTC_1_J	China_Tongcheng	CNTC	China
CNTC_10_J	China_Tongcheng	CNTC	China
CNTC_11_J	China_Tongcheng	CNTC	China
CNTC_12_J	China_Tongcheng	CNTC	China
CNTC_13_J	China_Tongcheng	CNTC	China
CNTC_14_J	China_Tongcheng	CNTC	China
CNTC_15_J	China_Tongcheng	CNTC	China
CNTC_16_J	China_Tongcheng	CNTC	China
CNTC_2_J	China_Tongcheng	CNTC	China
CNTC_3_J	China_Tongcheng	CNTC	China
CNTC_4_J	China_Tongcheng	CNTC	China
CNTC_5_J	China_Tongcheng	CNTC	China
CNTC_6_J	China_Tongcheng	CNTC	China
CNTC_7_J	China_Tongcheng	CNTC	China
CNTC_8_J	China_Tongcheng	CNTC	China
CNTC_9_J	China_Tongcheng	CNTC	China
CNWB1_1_W	China_Southern_WildBoar	CNWB1	China
CNWB1_2_W	China_Southern_WildBoar	CNWB1	China
CNWB1_3_W	China_Southern_WildBoar	CNWB1	China
CNWB1_4_W	China_Southern_WildBoar	CNWB1	China
CNWB1_5_W	China_Southern_WildBoar	CNWB1	China
CNWB2_1_W	China_Northern_WildBoar	CNWB2	China
CNWB2_2_W	China_Northern_WildBoar	CNWB2	China
CNWB2_3_W	China_Northern_WildBoar	CNWB2	China
CNWB2_4_W	China_Northern_WildBoar	CNWB2	China
CNWB2_5_W	China_Northern_WildBoar	CNWB2	China
CNWB3_1_J	China_Nanchang_WildBoar	CNWB3	China
CNWB3_10_J	China_Nanchang_WildBoar	CNWB3	China
CNWB3_11_J	China_Nanchang_WildBoar	CNWB3	China
CNWB3_12_J	China_Nanchang_WildBoar	CNWB3	China
CNWB3_13_J	China_Nanchang_WildBoar	CNWB3	China
CNWB3_14_J	China_Nanchang_WildBoar	CNWB3	China
CNWB3_15_J	China_Nanchang_WildBoar	CNWB3	China
CNWB3_2_J	China_Nanchang_WildBoar	CNWB3	China
CNWB3_3_J	China_Nanchang_WildBoar	CNWB3	China
CNWB3_4_J	China_Nanchang_WildBoar	CNWB3	China
CNWB3_5_J	China_Nanchang_WildBoar	CNWB3	China
CNWB3_6_J	China_Nanchang_WildBoar	CNWB3	China
CNWB3_7_J	China_Nanchang_WildBoar	CNWB3	China
CNWB3_8_J	China_Nanchang_WildBoar	CNWB3	China
CNWB3_9_J	China_Nanchang_WildBoar	CNWB3	China
CNWB4_1_J	China_Shangyou_WildBoar	CNWB4	China
CNWB4_2_J	China_Shangyou_WildBoar	CNWB4	China
CNWB4_3_J	China_Shangyou_WildBoar	CNWB4	China
CNWB4_4_J	China_Shangyou_WildBoar	CNWB4	China
CNWN_1_W	China_Wannan_Spotted	CNWN	China
CNWN_10_W	China_Wannan_Spotted	CNWN	China
CNWN_11_W	China_Wannan_Spotted	CNWN	China
CNWN_12_W	China_Wannan_Spotted	CNWN	China
CNWN_13_W	China_Wannan_Spotted	CNWN	China
CNWN_14_W	China_Wannan_Spotted	CNWN	China
CNWN_15_W	China_Wannan_Spotted	CNWN	China
CNWN_16_W	China_Wannan_Spotted	CNWN	China
CNWN_17_W	China_Wannan_Spotted	CNWN	China
CNWN_18_W	China_Wannan_Spotted	CNWN	China
CNWN_2_W	China_Wannan_Spotted	CNWN	China
CNWN_3_W	China_Wannan_Spotted	CNWN	China
CNWN_4_W	China_Wannan_Spotted	CNWN	China
CNWN_5_W	China_Wannan_Spotted	CNWN	China
CNWN_6_W	China_Wannan_Spotted	CNWN	China
CNWN_7_W	China_Wannan_Spotted	CNWN	China
CNWN_8_W	China_Wannan_Spotted	CNWN	China
CNWN_9_W	China_Wannan_Spotted	CNWN	China
CNWZ_1_J	China_Wuzhishan	CNWZ	China
CNWZ_10_J	China_Wuzhishan	CNWZ	China
CNWZ_11_J	China_Wuzhishan	CNWZ	China
CNWZ_12_J	China_Wuzhishan	CNWZ	China
CNWZ_13_J	China_Wuzhishan	CNWZ	China
CNWZ_14_J	China_Wuzhishan	CNWZ	China
CNWZ_15_J	China_Wuzhishan	CNWZ	China
CNWZ_16_J	China_Wuzhishan	CNWZ	China
CNWZ_2_J	China_Wuzhishan	CNWZ	China
CNWZ_3_J	China_Wuzhishan	CNWZ	China
CNWZ_4_J	China_Wuzhishan	CNWZ	China
CNWZ_5_J	China_Wuzhishan	CNWZ	China
CNWZ_6_J	China_Wuzhishan	CNWZ	China
CNWZ_7_J	China_Wuzhishan	CNWZ	China
CNWZ_8_J	China_Wuzhishan	CNWZ	China
CNWZ_9_J	China_Wuzhishan	CNWZ	China
CNXI_1_W	China_Xiang	CNXI	China
CNXI_10_W	China_Xiang	CNXI	China
CNXI_11_W	China_Xiang	CNXI	China
CNXI_12_W	China_Xiang	CNXI	China
CNXI_13_W	China_Xiang	CNXI	China
CNXI_2_W	China_Xiang	CNXI	China
CNXI_3_W	China_Xiang	CNXI	China
CNXI_4_W	China_Xiang	CNXI	China
CNXI_5_W	China_Xiang	CNXI	China
CNXI_6_W	China_Xiang	CNXI	China
CNXI_7_W	China_Xiang	CNXI	China
CNXI_8_W	China_Xiang	CNXI	China
CNXI_9_W	China_Xiang	CNXI	China
CNXZ_1_J	China_GongbujiangdaZang	CNXZ	China
CNXZ_12_J	China_GongbujiangdaZang	CNXZ	China
CNXZ_13_J	China_GongbujiangdaZang	CNXZ	China
CNXZ_14_J	China_GongbujiangdaZang	CNXZ	China
CNXZ_17_J	China_GongbujiangdaZang	CNXZ	China
CNXZ_18_J	China_GongbujiangdaZang	CNXZ	China
CNXZ_2_J	China_GongbujiangdaZang	CNXZ	China
CNXZ_21_J	China_GongbujiangdaZang	CNXZ	China
CNXZ_22_J	China_GongbujiangdaZang	CNXZ	China
CNXZ_23_J	China_GongbujiangdaZang	CNXZ	China
CNXZ_24_J	China_GongbujiangdaZang	CNXZ	China
CNXZ_25_J	China_GongbujiangdaZang	CNXZ	China
CNXZ_28_J	China_GongbujiangdaZang	CNXZ	China
CNXZ_29_J	China_GongbujiangdaZang	CNXZ	China
CNXZ_3_J	China_GongbujiangdaZang	CNXZ	China
CNXZ_4_J	China_GongbujiangdaZang	CNXZ	China
CNXZ_5_J	China_GongbujiangdaZang	CNXZ	China
CNXZ_6_J	China_GongbujiangdaZang	CNXZ	China
CNXZ_7_J	China_GongbujiangdaZang	CNXZ	China
CNXZ_8_J	China_GongbujiangdaZang	CNXZ	China
CNZA_1_W	China_Zang	CNZA	China
CNZA_10_W	China_Zang	CNZA	China
CNZA_11_W	China_Zang	CNZA	China
CNZA_12_W	China_Zang	CNZA	China
CNZA_13_W	China_Zang	CNZA	China
CNZA_14_W	China_Zang	CNZA	China
CNZA_15_W	China_Zang	CNZA	China
CNZA_16_W	China_Zang	CNZA	China
CNZA_17_W	China_Zang	CNZA	China
CNZA_18_W	China_Zang	CNZA	China
CNZA_19_W	China_Zang	CNZA	China
CNZA_2_W	China_Zang	CNZA	China
CNZA_3_W	China_Zang	CNZA	China
CNZA_4_W	China_Zang	CNZA	China
CNZA_5_W	China_Zang	CNZA	China
CNZA_6_W	China_Zang	CNZA	China
CNZA_7_W	China_Zang	CNZA	China
CNZA_8_W	China_Zang	CNZA	China
CNZA_9_W	China_Zang	CNZA	China
CSLM_10_W	Crossbreed_LargeWhite-Meishan	CSLM	Netherlands
CSLM_12_W	Crossbreed_LargeWhite-Meishan	CSLM	Netherlands
CSLM_13_W	Crossbreed_LargeWhite-Meishan	CSLM	Netherlands
CSLM_14_W	Crossbreed_LargeWhite-Meishan	CSLM	Netherlands
CSLM_16_W	Crossbreed_LargeWhite-Meishan	CSLM	Netherlands
CSLM_18_W	Crossbreed_LargeWhite-Meishan	CSLM	Netherlands
CSLM_19_W	Crossbreed_LargeWhite-Meishan	CSLM	Netherlands
CSLM_2_W	Crossbreed_LargeWhite-Meishan	CSLM	Netherlands
CSLM_20_W	Crossbreed_LargeWhite-Meishan	CSLM	Netherlands
CSLM_21_W	Crossbreed_LargeWhite-Meishan	CSLM	Netherlands
CSLM_22_W	Crossbreed_LargeWhite-Meishan	CSLM	Netherlands
CSLM_23_W	Crossbreed_LargeWhite-Meishan	CSLM	Netherlands
CSLM_24_W	Crossbreed_LargeWhite-Meishan	CSLM	Netherlands
CSLM_3_W	Crossbreed_LargeWhite-Meishan	CSLM	Netherlands
CSLM_5_W	Crossbreed_LargeWhite-Meishan	CSLM	Netherlands
CSLM_6_W	Crossbreed_LargeWhite-Meishan	CSLM	Netherlands
CSLM_7_W	Crossbreed_LargeWhite-Meishan	CSLM	Netherlands
CSLM_8_W	Crossbreed_LargeWhite-Meishan	CSLM	Netherlands
CSLM_9_W	Crossbreed_LargeWhite-Meishan	CSLM	Netherlands
CSPL_1_W	Crossbreed_Pietrain-LargeWhite	CSPL	Netherlands
CSPL_10_W	Crossbreed_Pietrain-LargeWhite	CSPL	Netherlands
CSPL_11_W	Crossbreed_Pietrain-LargeWhite	CSPL	Netherlands
CSPL_12_W	Crossbreed_Pietrain-LargeWhite	CSPL	Netherlands
CSPL_13_W	Crossbreed_Pietrain-LargeWhite	CSPL	Netherlands
CSPL_14_W	Crossbreed_Pietrain-LargeWhite	CSPL	Netherlands
CSPL_15_W	Crossbreed_Pietrain-LargeWhite	CSPL	Netherlands
CSPL_16_W	Crossbreed_Pietrain-LargeWhite	CSPL	Netherlands
CSPL_17_W	Crossbreed_Pietrain-LargeWhite	CSPL	Netherlands
CSPL_18_W	Crossbreed_Pietrain-LargeWhite	CSPL	Netherlands
CSPL_19_W	Crossbreed_Pietrain-LargeWhite	CSPL	Netherlands
CSPL_2_W	Crossbreed_Pietrain-LargeWhite	CSPL	Netherlands
CSPL_20_W	Crossbreed_Pietrain-LargeWhite	CSPL	Netherlands
CSPL_3_W	Crossbreed_Pietrain-LargeWhite	CSPL	Netherlands
CSPL_4_W	Crossbreed_Pietrain-LargeWhite	CSPL	Netherlands
CSPL_5_W	Crossbreed_Pietrain-LargeWhite	CSPL	Netherlands
CSPL_6_W	Crossbreed_Pietrain-LargeWhite	CSPL	Netherlands
CSPL_7_W	Crossbreed_Pietrain-LargeWhite	CSPL	Netherlands
CSPL_8_W	Crossbreed_Pietrain-LargeWhite	CSPL	Netherlands
CSPL_9_W	Crossbreed_Pietrain-LargeWhite	CSPL	Netherlands
DUR1_1_W	Duroc	DUR1	Denmark
DUR1_10_W	Duroc	DUR1	Denmark
DUR1_11_W	Duroc	DUR1	Denmark
DUR1_12_W	Duroc	DUR1	Denmark
DUR1_13_W	Duroc	DUR1	Denmark
DUR1_14_W	Duroc	DUR1	Denmark
DUR1_15_W	Duroc	DUR1	Denmark
DUR1_16_W	Duroc	DUR1	Denmark
DUR1_17_W	Duroc	DUR1	Denmark
DUR1_18_W	Duroc	DUR1	Denmark
DUR1_19_W	Duroc	DUR1	Denmark
DUR1_2_W	Duroc	DUR1	Denmark
DUR1_3_W	Duroc	DUR1	Denmark
DUR1_4_W	Duroc	DUR1	Denmark
DUR1_5_W	Duroc	DUR1	Denmark
DUR1_6_W	Duroc	DUR1	Denmark
DUR1_7_W	Duroc	DUR1	Denmark
DUR1_8_W	Duroc	DUR1	Denmark
DUR1_9_W	Duroc	DUR1	Denmark
DUR3_12_W	Duroc	DUR3	Netherlands
DUR3_13_W	Duroc	DUR3	Netherlands
DUR3_14_W	Duroc	DUR3	Netherlands
DUR3_15_W	Duroc	DUR3	Netherlands
DUR3_16_W	Duroc	DUR3	Netherlands
DUR3_17_W	Duroc	DUR3	Netherlands
DUR3_18_W	Duroc	DUR3	Netherlands
DUR3_19_W	Duroc	DUR3	Netherlands
DUR3_20_W	Duroc	DUR3	Netherlands
DUR3_21_W	Duroc	DUR3	Netherlands
DUR3_22_W	Duroc	DUR3	Netherlands
DUR3_23_W	Duroc	DUR3	Netherlands
DUR3_24_W	Duroc	DUR3	Netherlands
DUR3_25_W	Duroc	DUR3	Netherlands
DUR3_26_W	Duroc	DUR3	Netherlands
DUR3_27_W	Duroc	DUR3	Netherlands
DUR3_28_W	Duroc	DUR3	Netherlands
DUR3_30_W	Duroc	DUR3	Netherlands
DUR3_32_W	Duroc	DUR3	Netherlands
DUR3_37_W	Duroc	DUR3	Netherlands
DUR4_10_J	Duroc	DUR4	China
DUR4_11_J	Duroc	DUR4	China
DUR4_12_J	Duroc	DUR4	China
DUR4_13_J	Duroc	DUR4	China
DUR4_14_J	Duroc	DUR4	China
DUR4_15_J	Duroc	DUR4	China
DUR4_16_J	Duroc	DUR4	China
DUR4_17_J	Duroc	DUR4	China
DUR4_19_J	Duroc	DUR4	China
DUR4_2_J	Duroc	DUR4	China
DUR4_20_J	Duroc	DUR4	China
DUR4_22_J	Duroc	DUR4	China
DUR4_24_J	Duroc	DUR4	China
DUR4_25_J	Duroc	DUR4	China
DUR4_3_J	Duroc	DUR4	China
DUR4_4_J	Duroc	DUR4	China
DUR4_5_J	Duroc	DUR4	China
DUR4_6_J	Duroc	DUR4	China
DUR4_7_J	Duroc	DUR4	China
DUR4_9_J	Duroc	DUR4	China
KPKO_1_W	Korea_Local	KPKO	Korea
KPKO_2_W	Korea_Local	KPKO	Korea
KPKO_3_W	Korea_Local	KPKO	Korea
KPKO_4_W	Korea_Local	KPKO	Korea
KPKO_5_W	Korea_Local	KPKO	Korea
KPKO_6_W	Korea_Local	KPKO	Korea
KPKO_7_W	Korea_Local	KPKO	Korea
KPKO_8_W	Korea_Local	KPKO	Korea
KPKO_9_W	Korea_Local	KPKO	Korea
LDR2_1_W	Landrace	LDR2	Norway
LDR2_10_W	Landrace	LDR2	Norway
LDR2_11_W	Landrace	LDR2	Norway
LDR2_12_W	Landrace	LDR2	Norway
LDR2_13_W	Landrace	LDR2	Norway
LDR2_14_W	Landrace	LDR2	Norway
LDR2_15_W	Landrace	LDR2	Norway
LDR2_2_W	Landrace	LDR2	Norway
LDR2_3_W	Landrace	LDR2	Norway
LDR2_4_W	Landrace	LDR2	Norway
LDR2_5_W	Landrace	LDR2	Norway
LDR2_6_W	Landrace	LDR2	Norway
LDR2_7_W	Landrace	LDR2	Norway
LDR2_8_W	Landrace	LDR2	Norway
LDR2_9_W	Landrace	LDR2	Norway
LDR3_1_W	Landrace	LDR3	Finland
LDR3_10_W	Landrace	LDR3	Finland
LDR3_11_W	Landrace	LDR3	Finland
LDR3_12_W	Landrace	LDR3	Finland
LDR3_13_W	Landrace	LDR3	Finland
LDR3_14_W	Landrace	LDR3	Finland
LDR3_15_W	Landrace	LDR3	Finland
LDR3_2_W	Landrace	LDR3	Finland
LDR3_3_W	Landrace	LDR3	Finland
LDR3_4_W	Landrace	LDR3	Finland
LDR3_5_W	Landrace	LDR3	Finland
LDR3_6_W	Landrace	LDR3	Finland
LDR3_7_W	Landrace	LDR3	Finland
LDR3_8_W	Landrace	LDR3	Finland
LDR4_10_J	Landrace	LDR4	China
LDR4_11_J	Landrace	LDR4	China
LDR4_12_J	Landrace	LDR4	China
LDR4_13_J	Landrace	LDR4	China
LDR4_15_J	Landrace	LDR4	China
LDR4_16_J	Landrace	LDR4	China
LDR4_17_J	Landrace	LDR4	China
LDR4_18_J	Landrace	LDR4	China
LDR4_23_J	Landrace	LDR4	China
LDR4_24_J	Landrace	LDR4	China
LDR4_26_J	Landrace	LDR4	China
LDR4_29_J	Landrace	LDR4	China
LDR4_30_J	Landrace	LDR4	China
LDR4_31_J	Landrace	LDR4	China
LDR4_33_J	Landrace	LDR4	China
LDR4_35_J	Landrace	LDR4	China
LDR4_4_J	Landrace	LDR4	China
LDR4_6_J	Landrace	LDR4	China
LDR4_8_J	Landrace	LDR4	China
LDR4_9_J	Landrace	LDR4	China
LDR5_1_W	Landrace	LDR5	USA
LDR5_12_W	Landrace	LDR5	USA
LDR5_17_W	Landrace	LDR5	USA
LDR5_18_W	Landrace	LDR5	USA
LDR5_20_W	Landrace	LDR5	USA
LDR5_21_W	Landrace	LDR5	USA
LDR5_22_W	Landrace	LDR5	USA
LDR5_23_W	Landrace	LDR5	USA
LDR5_24_W	Landrace	LDR5	USA
LDR5_28_W	Landrace	LDR5	USA
LDR5_29_W	Landrace	LDR5	USA
LDR5_3_W	Landrace	LDR5	USA
LDR5_30_W	Landrace	LDR5	USA
LDR5_31_W	Landrace	LDR5	USA
LDR5_4_W	Landrace	LDR5	USA
LDR5_5_W	Landrace	LDR5	USA
LDR5_6_W	Landrace	LDR5	USA
LDR5_7_W	Landrace	LDR5	USA
LDR5_8_W	Landrace	LDR5	USA
LDR5_9_W	Landrace	LDR5	USA
LDR6_10_M	Landrace	LDR6	Spain
LDR6_11_M	Landrace	LDR6	Spain
LDR6_12_M	Landrace	LDR6	Spain
LDR6_13_M	Landrace	LDR6	Spain
LDR6_14_M	Landrace	LDR6	Spain
LDR6_15_M	Landrace	LDR6	Spain
LDR6_18_M	Landrace	LDR6	Spain
LDR6_19_M	Landrace	LDR6	Spain
LDR6_2_M	Landrace	LDR6	Spain
LDR6_20_M	Landrace	LDR6	Spain
LDR6_21_M	Landrace	LDR6	Spain
LDR6_22_M	Landrace	LDR6	Spain
LDR6_25_M	Landrace	LDR6	Spain
LDR6_26_M	Landrace	LDR6	Spain
LDR6_27_M	Landrace	LDR6	Spain
LDR6_28_M	Landrace	LDR6	Spain
LDR6_3_M	Landrace	LDR6	Spain
LDR6_4_M	Landrace	LDR6	Spain
LDR6_8_M	Landrace	LDR6	Spain
LDR6_9_M	Landrace	LDR6	Spain
LDR7_18_W	Landrace	LDR7	Netherlands
LDR7_19_W	Landrace	LDR7	Netherlands
LDR7_25_W	Landrace	LDR7	Netherlands
LDR7_26_W	Landrace	LDR7	Netherlands
LDR7_38_W	Landrace	LDR7	Netherlands
LDR7_39_W	Landrace	LDR7	Netherlands
LDR7_40_W	Landrace	LDR7	Netherlands
LDR7_41_W	Landrace	LDR7	Netherlands
LDR7_42_W	Landrace	LDR7	Netherlands
LDR7_43_W	Landrace	LDR7	Netherlands
LDR7_44_W	Landrace	LDR7	Netherlands
LDR7_45_W	Landrace	LDR7	Netherlands
LDR7_47_W	Landrace	LDR7	Netherlands
LDR7_50_W	Landrace	LDR7	Netherlands
LDR7_51_W	Landrace	LDR7	Netherlands
LDR7_52_W	Landrace	LDR7	Netherlands
LDR7_53_W	Landrace	LDR7	Netherlands
LDR7_54_W	Landrace	LDR7	Netherlands
LDR7_55_W	Landrace	LDR7	Netherlands
LDR7_56_W	Landrace	LDR7	Netherlands
LWT1_1_W	LargeWhite	LWT1	Denmark
LWT1_10_W	LargeWhite	LWT1	Denmark
LWT1_11_W	LargeWhite	LWT1	Denmark
LWT1_12_W	LargeWhite	LWT1	Denmark
LWT1_13_W	LargeWhite	LWT1	Denmark
LWT1_14_W	LargeWhite	LWT1	Denmark
LWT1_15_W	LargeWhite	LWT1	Denmark
LWT1_16_W	LargeWhite	LWT1	Denmark
LWT1_2_W	LargeWhite	LWT1	Denmark
LWT1_3_W	LargeWhite	LWT1	Denmark
LWT1_4_W	LargeWhite	LWT1	Denmark
LWT1_5_W	LargeWhite	LWT1	Denmark
LWT1_6_W	LargeWhite	LWT1	Denmark
LWT1_7_W	LargeWhite	LWT1	Denmark
LWT1_8_W	LargeWhite	LWT1	Denmark
LWT1_9_W	LargeWhite	LWT1	Denmark
LWT2_1_J	LargeWhite	LWT2	China
LWT2_15_J	LargeWhite	LWT2	China
LWT2_17_J	LargeWhite	LWT2	China
LWT2_18_J	LargeWhite	LWT2	China
LWT2_2_J	LargeWhite	LWT2	China
LWT2_23_J	LargeWhite	LWT2	China
LWT2_24_J	LargeWhite	LWT2	China
LWT2_25_J	LargeWhite	LWT2	China
LWT2_26_J	LargeWhite	LWT2	China
LWT2_27_J	LargeWhite	LWT2	China
LWT2_29_J	LargeWhite	LWT2	China
LWT2_3_J	LargeWhite	LWT2	China
LWT2_31_J	LargeWhite	LWT2	China
LWT2_32_J	LargeWhite	LWT2	China
LWT2_33_J	LargeWhite	LWT2	China
LWT2_35_J	LargeWhite	LWT2	China
LWT2_4_J	LargeWhite	LWT2	China
LWT2_5_J	LargeWhite	LWT2	China
LWT2_6_J	LargeWhite	LWT2	China
LWT2_7_J	LargeWhite	LWT2	China
LWT3_17_W	LargeWhite	LWT3	USA
LWT3_20_W	LargeWhite	LWT3	USA
LWT3_21_W	LargeWhite	LWT3	USA
LWT3_24_W	LargeWhite	LWT3	USA
LWT3_25_W	LargeWhite	LWT3	USA
LWT3_28_W	LargeWhite	LWT3	USA
LWT3_30_W	LargeWhite	LWT3	USA
LWT3_31_W	LargeWhite	LWT3	USA
LWT3_32_W	LargeWhite	LWT3	USA
LWT3_33_W	LargeWhite	LWT3	USA
LWT3_36_W	LargeWhite	LWT3	USA
LWT3_38_W	LargeWhite	LWT3	USA
LWT3_39_W	LargeWhite	LWT3	USA
LWT3_40_W	LargeWhite	LWT3	USA
LWT3_41_W	LargeWhite	LWT3	USA
LWT3_42_W	LargeWhite	LWT3	USA
LWT3_44_W	LargeWhite	LWT3	USA
LWT3_45_W	LargeWhite	LWT3	USA
LWT3_8_W	LargeWhite	LWT3	USA
LWT3_9_W	LargeWhite	LWT3	USA
LWT4_61_W	LargeWhite	LWT4	Netherlands
LWT4_62_W	LargeWhite	LWT4	Netherlands
LWT4_63_W	LargeWhite	LWT4	Netherlands
LWT4_64_W	LargeWhite	LWT4	Netherlands
LWT4_65_W	LargeWhite	LWT4	Netherlands
LWT4_67_W	LargeWhite	LWT4	Netherlands
LWT4_69_W	LargeWhite	LWT4	Netherlands
LWT4_70_W	LargeWhite	LWT4	Netherlands
LWT4_71_W	LargeWhite	LWT4	Netherlands
LWT4_72_W	LargeWhite	LWT4	Netherlands
LWT4_73_W	LargeWhite	LWT4	Netherlands
LWT4_74_W	LargeWhite	LWT4	Netherlands
LWT4_75_W	LargeWhite	LWT4	Netherlands
LWT4_76_W	LargeWhite	LWT4	Netherlands
LWT4_77_W	LargeWhite	LWT4	Netherlands
LWT4_79_W	LargeWhite	LWT4	Netherlands
LWT4_80_W	LargeWhite	LWT4	Netherlands
LWT4_82_W	LargeWhite	LWT4	Netherlands
LWT4_83_W	LargeWhite	LWT4	Netherlands
LWT4_84_W	LargeWhite	LWT4	Netherlands
PIT2_33_W	Pietrain	PIT2	Netherlands
PIT2_34_W	Pietrain	PIT2	Netherlands
PIT2_35_W	Pietrain	PIT2	Netherlands
PIT2_36_W	Pietrain	PIT2	Netherlands
PIT2_37_W	Pietrain	PIT2	Netherlands
PIT2_38_W	Pietrain	PIT2	Netherlands
PIT2_40_W	Pietrain	PIT2	Netherlands
PIT2_41_W	Pietrain	PIT2	Netherlands
PIT2_42_W	Pietrain	PIT2	Netherlands
PIT2_43_W	Pietrain	PIT2	Netherlands
PIT2_45_W	Pietrain	PIT2	Netherlands
PIT2_46_W	Pietrain	PIT2	Netherlands
PIT2_47_W	Pietrain	PIT2	Netherlands
PIT2_48_W	Pietrain	PIT2	Netherlands
PIT2_49_W	Pietrain	PIT2	Netherlands
PIT2_50_W	Pietrain	PIT2	Netherlands
PIT2_51_W	Pietrain	PIT2	Netherlands
PIT2_53_W	Pietrain	PIT2	Netherlands
PIT2_56_W	Pietrain	PIT2	Netherlands
PIT2_57_W	Pietrain	PIT2	Netherlands
PIT3_1_W	Pietrain	PIT3	Germany
PIT3_10_W	Pietrain	PIT3	Germany
PIT3_11_W	Pietrain	PIT3	Germany
PIT3_12_W	Pietrain	PIT3	Germany
PIT3_13_W	Pietrain	PIT3	Germany
PIT3_14_W	Pietrain	PIT3	Germany
PIT3_15_W	Pietrain	PIT3	Germany
PIT3_16_W	Pietrain	PIT3	Germany
PIT3_17_W	Pietrain	PIT3	Germany
PIT3_18_W	Pietrain	PIT3	Germany
PIT3_2_W	Pietrain	PIT3	Germany
PIT3_3_W	Pietrain	PIT3	Germany
PIT3_4_W	Pietrain	PIT3	Germany
PIT3_5_W	Pietrain	PIT3	Germany
PIT3_6_W	Pietrain	PIT3	Germany
PIT3_7_W	Pietrain	PIT3	Germany
PIT3_8_W	Pietrain	PIT3	Germany
PIT3_9_W	Pietrain	PIT3	Germany
THCD_1_W	Thailand_ChiangDao_ChiangMai	THCD	Thailand
THCD_2_W	Thailand_ChiangDao_ChiangMai	THCD	Thailand
THCD_3_W	Thailand_ChiangDao_ChiangMai	THCD	Thailand
THCD_4_W	Thailand_ChiangDao_ChiangMai	THCD	Thailand
THCD_5_W	Thailand_ChiangDao_ChiangMai	THCD	Thailand
THCD_6_W	Thailand_ChiangDao_ChiangMai	THCD	Thailand
THCD_7_W	Thailand_ChiangDao_ChiangMai	THCD	Thailand
THJT_1_W	Thailand_JhomThong_ChiangMai	THJT	Thailand
THJT_2_W	Thailand_JhomThong_ChiangMai	THJT	Thailand
THJT_3_W	Thailand_JhomThong_ChiangMai	THJT	Thailand
THJT_4_W	Thailand_JhomThong_ChiangMai	THJT	Thailand
THJT_5_W	Thailand_JhomThong_ChiangMai	THJT	Thailand
THJT_6_W	Thailand_JhomThong_ChiangMai	THJT	Thailand
THOK_1_W	Thailand_Om_Koi_ChiangMai	THOK	Thailand
THOK_2_W	Thailand_Om_Koi_ChiangMai	THOK	Thailand
THOK_3_W	Thailand_Om_Koi_ChiangMai	THOK	Thailand
THOK_4_W	Thailand_Om_Koi_ChiangMai	THOK	Thailand
THOK_5_W	Thailand_Om_Koi_ChiangMai	THOK	Thailand
THOK_6_W	Thailand_Om_Koi_ChiangMai	THOK	Thailand
UKBK_1_W	UK_Berkshire	UKBK	UK
UKBK_11_W	UK_Berkshire	UKBK	UK
UKBK_12_W	UK_Berkshire	UKBK	UK
UKBK_13_W	UK_Berkshire	UKBK	UK
UKBK_14_W	UK_Berkshire	UKBK	UK
UKBK_15_W	UK_Berkshire	UKBK	UK
UKBK_19_W	UK_Berkshire	UKBK	UK
UKBK_2_W	UK_Berkshire	UKBK	UK
UKBK_20_W	UK_Berkshire	UKBK	UK
UKBK_21_W	UK_Berkshire	UKBK	UK
UKBK_22_W	UK_Berkshire	UKBK	UK
UKBK_25_W	UK_Berkshire	UKBK	UK
UKBK_26_W	UK_Berkshire	UKBK	UK
UKBK_27_W	UK_Berkshire	UKBK	UK
UKBK_3_W	UK_Berkshire	UKBK	UK
UKBK_4_W	UK_Berkshire	UKBK	UK
UKBK_6_W	UK_Berkshire	UKBK	UK
UKBK_7_W	UK_Berkshire	UKBK	UK
UKBK_8_W	UK_Berkshire	UKBK	UK
UKBK_9_W	UK_Berkshire	UKBK	UK
UKHS_1_W	UK_Hampshire	UKHS	UK
UKHS_10_W	UK_Hampshire	UKHS	UK
UKHS_11_W	UK_Hampshire	UKHS	UK
UKHS_12_W	UK_Hampshire	UKHS	UK
UKHS_13_W	UK_Hampshire	UKHS	UK
UKHS_14_W	UK_Hampshire	UKHS	UK
UKHS_15_W	UK_Hampshire	UKHS	UK
UKHS_16_W	UK_Hampshire	UKHS	UK
UKHS_17_W	UK_Hampshire	UKHS	UK
UKHS_18_W	UK_Hampshire	UKHS	UK
UKHS_2_W	UK_Hampshire	UKHS	UK
UKHS_23_W	UK_Hampshire	UKHS	UK
UKHS_24_W	UK_Hampshire	UKHS	UK
UKHS_3_W	UK_Hampshire	UKHS	UK
UKHS_4_W	UK_Hampshire	UKHS	UK
UKHS_5_W	UK_Hampshire	UKHS	UK
UKHS_6_W	UK_Hampshire	UKHS	UK
UKHS_7_W	UK_Hampshire	UKHS	UK
UKHS_8_W	UK_Hampshire	UKHS	UK
UKHS_9_W	UK_Hampshire	UKHS	UK
UKMW_10_W	UK_Middle_White	UKMW	UK
UKMW_11_W	UK_Middle_White	UKMW	UK
UKMW_12_W	UK_Middle_White	UKMW	UK
UKMW_13_W	UK_Middle_White	UKMW	UK
UKMW_14_W	UK_Middle_White	UKMW	UK
UKMW_15_W	UK_Middle_White	UKMW	UK
UKMW_16_W	UK_Middle_White	UKMW	UK
UKMW_17_W	UK_Middle_White	UKMW	UK
UKMW_20_W	UK_Middle_White	UKMW	UK
UKMW_21_W	UK_Middle_White	UKMW	UK
UKMW_22_W	UK_Middle_White	UKMW	UK
UKMW_23_W	UK_Middle_White	UKMW	UK
UKMW_26_W	UK_Middle_White	UKMW	UK
UKMW_27_W	UK_Middle_White	UKMW	UK
UKMW_4_W	UK_Middle_White	UKMW	UK
UKMW_5_W	UK_Middle_White	UKMW	UK
UKMW_6_W	UK_Middle_White	UKMW	UK
UKMW_7_W	UK_Middle_White	UKMW	UK
UKMW_8_W	UK_Middle_White	UKMW	UK
UKMW_9_W	UK_Middle_White	UKMW	UK
USBK_15_W	USA_Berkshire	USBK	USA
USBK_16_W	USA_Berkshire	USBK	USA
USBK_18_W	USA_Berkshire	USBK	USA
USBK_2_W	USA_Berkshire	USBK	USA
USBK_20_W	USA_Berkshire	USBK	USA
USBK_21_W	USA_Berkshire	USBK	USA
USBK_22_W	USA_Berkshire	USBK	USA
USBK_28_W	USA_Berkshire	USBK	USA
USBK_30_W	USA_Berkshire	USBK	USA
USBK_31_W	USA_Berkshire	USBK	USA
USBK_34_W	USA_Berkshire	USBK	USA
USBK_35_W	USA_Berkshire	USBK	USA
USBK_36_W	USA_Berkshire	USBK	USA
USBK_37_W	USA_Berkshire	USBK	USA
USBK_39_W	USA_Berkshire	USBK	USA
USBK_40_W	USA_Berkshire	USBK	USA
USBK_42_W	USA_Berkshire	USBK	USA
USBK_7_W	USA_Berkshire	USBK	USA
USBK_8_W	USA_Berkshire	USBK	USA
USBK_9_W	USA_Berkshire	USBK	USA
USHS_11_W	USA_Hampshire	USHS	USA
USHS_12_W	USA_Hampshire	USHS	USA
USHS_15_W	USA_Hampshire	USHS	USA
USHS_16_W	USA_Hampshire	USHS	USA
USHS_18_W	USA_Hampshire	USHS	USA
USHS_19_W	USA_Hampshire	USHS	USA
USHS_2_W	USA_Hampshire	USHS	USA
USHS_20_W	USA_Hampshire	USHS	USA
USHS_21_W	USA_Hampshire	USHS	USA
USHS_23_W	USA_Hampshire	USHS	USA
USHS_24_W	USA_Hampshire	USHS	USA
USHS_26_W	USA_Hampshire	USHS	USA
USHS_27_W	USA_Hampshire	USHS	USA
USHS_28_W	USA_Hampshire	USHS	USA
USHS_30_W	USA_Hampshire	USHS	USA
USHS_32_W	USA_Hampshire	USHS	USA
USHS_34_W	USA_Hampshire	USHS	USA
USHS_35_W	USA_Hampshire	USHS	USA
USHS_37_W	USA_Hampshire	USHS	USA
USHS_38_W	USA_Hampshire	USHS	USA
USPC_1_W	USA_Poland_China	USPC	USA
USPC_2_W	USA_Poland_China	USPC	USA
USPC_3_W	USA_Poland_China	USPC	USA
USPC_4_W	USA_Poland_China	USPC	USA
USPC_5_W	USA_Poland_China	USPC	USA
USPC_6_W	USA_Poland_China	USPC	USA
RUMS_1_J	Russia_Minisibs	RUMS	Russia
RUMS_10_J	Russia_Minisibs	RUMS	Russia
RUMS_11_J	Russia_Minisibs	RUMS	Russia
RUMS_12_J	Russia_Minisibs	RUMS	Russia
RUMS_13_J	Russia_Minisibs	RUMS	Russia
RUMS_14_J	Russia_Minisibs	RUMS	Russia
RUMS_2_J	Russia_Minisibs	RUMS	Russia
RUMS_3_J	Russia_Minisibs	RUMS	Russia
RUMS_4_J	Russia_Minisibs	RUMS	Russia
RUMS_5_J	Russia_Minisibs	RUMS	Russia
RUMS_6_J	Russia_Minisibs	RUMS	Russia
RUMS_7_J	Russia_Minisibs	RUMS	Russia
RUMS_8_J	Russia_Minisibs	RUMS	Russia
RUMS_9_J	Russia_Minisibs	RUMS	Russia

## Sheet: Table S3
Table S3. The following candidate parameters were used for SVM: “C”, penalty parameter; “gamma”, only used for ‘rbf’ kernel.
Parameter	Value
C	0.001,0.002,0.003,0.004,0.005,0.006,0.007,0.008,0.009, 0.01,0.05, 0.06, 0.07,0.08, 0.1, 0.15, 0.16, 0.17, 0.18, 0.185,0.19,0.195, 0.2, 0.22, 0.3, 1, 10, 90, 100, 1000
kernel type	‘linear’ , ‘rbf’
gamma	0.01, 0.001, 0.002, 0.0001,0.0002

## Sheet: Table S4
Table S4. Detailed description of 199 sets. For each set, the number of AIMs in all groups was generated by merging the AIMs in each of the three paired groups and removing duplicates.
ID	The number of AIMs in each paired group	The number AIMs in all groups
1	2	4
2	3	7
3	4	9
4	5	12
5	6	15
6	7	18
7	8	21
8	9	23
9	10	25
10	11	27
11	12	30
12	13	32
13	14	35
14	15	38
15	16	41
16	17	44
17	18	45
18	19	47
19	20	49
20	21	51
21	22	52
22	23	54
23	24	56
24	25	59
25	26	62
26	27	65
27	28	68
28	29	70
29	30	72
30	31	74
31	32	77
32	33	78
33	34	80
34	35	82
35	36	83
36	37	85
37	38	87
38	39	88
39	40	90
40	41	92
41	42	94
42	43	97
43	44	100
44	45	102
45	46	104
46	47	106
47	48	108
48	49	110
49	50	113
50	51	115
51	52	116
52	53	118
53	54	119
54	55	121
55	56	123
56	57	124
57	58	125
58	59	127
59	60	129
60	61	131
61	62	134
62	63	136
63	64	138
64	65	140
65	66	142
66	67	143
67	68	145
68	69	146
69	70	147
70	71	149
71	72	150
72	73	151
73	74	152
74	75	153
75	76	155
76	77	157
77	78	159
78	79	162
79	80	164
80	81	166
81	82	168
82	83	170
83	84	171
84	85	174
85	86	176
86	87	178
87	88	180
88	89	182
89	90	185
90	91	187
91	92	190
92	93	193
93	94	195
94	95	197
95	96	199
96	97	201
97	98	204
98	99	206
99	100	208
100	101	210
101	102	211
102	103	212
103	104	214
104	105	217
105	106	220
106	107	221
107	108	222
108	109	224
109	110	226
110	111	228
111	112	230
112	113	232
113	114	234
114	115	235
115	116	237
116	117	238
117	118	241
118	119	243
119	120	246
120	121	248
121	122	251
122	123	252
123	124	254
124	125	257
125	126	259
126	127	261
127	128	262
128	129	264
129	130	267
130	131	270
131	132	272
132	133	274
133	134	276
134	135	278
135	136	279
136	137	281
137	138	283
138	139	285
139	140	286
140	141	289
141	142	292
142	143	293
143	144	296
144	145	298
145	146	300
146	147	301
147	148	302
148	149	305
149	150	308
150	151	310
151	152	311
152	153	313
153	154	316
154	155	318
155	156	320
156	157	321
157	158	323
158	159	325
159	160	326
160	161	328
161	162	330
162	163	332
163	164	335
164	165	338
165	166	340
166	167	342
167	168	343
168	169	344
169	170	345
170	171	346
171	172	348
172	173	350
173	174	351
174	175	353
175	176	355
176	177	357
177	178	360
178	179	363
179	180	365
180	181	367
181	182	369
182	183	370
183	184	371
184	185	374
185	186	375
186	187	377
187	188	379
188	189	381
189	190	382
190	191	384
191	192	386
192	193	388
193	194	389
194	195	390
195	196	392
196	197	394
197	198	397
198	199	400
199	200	403

## Sheet: Table S5
Table S5. Two multiclass classification metrics are used for evaluting the three groups discrimination performance of the different number of AIMs and random markers.
Markers	Cohen’s kappa	Balanced error rate
Four AIMs	0.9681	0.0196
Seven AIMs	1	0
Four random markers	0.5493	0.3033
Seven random markers	0.5178	0.3255

## Sheet: Table S6
Table S6. The function of fitting the CV curve of different panels in three groups which were generated by supervised ADMIXTURE. r: correlation coefficient .
Category	Function	r	Slope of the tangent
			82 AIMs	129 AIMs	403 AIMs
ECHP		0.9827	-0.0012	-0.0004	-0.0001
SCHP		0.976	-0.001	-0.0004	-0.0001
EUCP		0.9967	-0.0003	-0.0001	0

## Sheet: Table S7
Table S7. Allele frequency for 129 AIMs. The marker ID, location on genome, the base of two alleles, the A1 frequency in each population and in each group and the chi-square test p value of the allele heterogeneous frequencies among breeds from same group. Seven AIMs which can completely discriminate three groups were marked by bold font.
SNP	Chr	Position	A1	A2		Allele frequency of A1														Chi-square test p value
						PIT1	LDR1	DUR2	EUCP	CNBX	CNLU	CNCJ	CNDH	SCHP	CNJH	CNEH	CNMS	ECHP		ECHP	SCHP	EUCP
ALGA0003690	1	64094344	G	A		0.7	0.725	0.5	0.6417	0.5312	0.3889	0.25	0.7188	0.4697	0	0	0	0		1	0.0067	0.3858
MARC0023378	1	148309548	C	T		1	1	1	1	0	0	0	0	0	0	0.05	0	0.0167		0.113	1	1
INRA0004282	1	149824800	T	C		1	1	1	1	0	0	0	0	0	0	0.05	0	0.0167		0.113	1	1
DRGA0001542	1	150801717	G	A		1	1	1	1	0	0.0556	0.0312	0	0.0227	0	0.05	0	0.0167		0.113	0.193	1
INRA0004312	1	152175324	G	A		1	1	1	1	0	0	0	0	0	0	0.05	0	0.0167		0.113	1	1
H3GA0002811	1	153144281	T	C		0.975	1	1	0.9917	0	0	0	0	0	0	0.05	0	0.0167		0.113	1	0.8239
INRA0004460	1	158429254	T	C		0.975	1	0.925	0.9667	0	0	0	0	0	0	0.05	0	0.0167		0.113	1	0.0041
ASGA0004738	1	159450284	T	C		0.975	1	0.925	0.9667	0	0	0	0	0	0	0.05	0	0.0167		0.113	1	0.0041
MARC0036323	1	162068596	A	C		0.975	1	0.925	0.9667	0	0	0	0	0	0	0.05	0	0.0167		0.113	1	0.0041
H3GA0002947	1	162610557	A	G		1	1	0.975	0.9917	0	0	0	0	0	0	0.05	0	0.0167		0.113	1	0.8239
M1GA0001158	1	163303972	T	G		1	1	1	1	0	0	0	0	0	0	0.05	0	0.0167		0.113	1	1
ASGA0005014	1	179090814	A	G		0	0.075	0	0.025	0.9375	1	1	0.9688	0.9773	0.075	0.05	0.35	0.1583		0.0011	0.1204	0.0012
DRGA0001670	1	192768198	T	G		1	0.975	1	0.9917	0	0	0	0	0	0.05	0.275	0.125	0.15		0.0379	1	0.8239
DRGA0001766	1	201005516	T	C		0	0	0	0	0.875	0.5556	0.8125	0.5938	0.7045	0.1	0.075	0.05	0.075		0.9768	0.0269	1
INRA0005593	1	211778061	T	C		1	1	1	1	0	0	0	0	0	0	0.025	0.075	0.0333		0.0041	1	1
INRA0005652	1	214740742	C	A		1	1	0.925	0.975	0	0	0	0	0	0	0.025	0	0.0083		0.8239	1	0.0012
ALGA0007467	1	215925031	G	A		1	1	0.925	0.975	0	0	0	0	0	0	0.025	0	0.0083		0.8239	1	0.0012
ALGA0007539	1	220517767	A	G		0.3	0.15	0.3	0.25	0.5625	0.75	0.25	0.5312	0.5303	0	0	0	0		1	0.0018	0.5366
M1GA0002066	1	307474784	T	C		0	0	0	0	0	0	0.0312	0.0938	0.0303	0.4	0.6	0.6	0.5333		0.4874	0.0039	1
H3GA0005443	1	311685793	A	G		0.975	1	0.95	0.975	0	0	0	0	0	0	0.05	0	0.0167		0.113	1	0.0992
ASGA0102470	2	2261977	A	G		0.95	1	0.95	0.9667	0	0	0	0	0	0	0	0	0		1	1	0.0054
ASGA0008848	2	7823419	G	T		0.1	0.15	0.325	0.1917	0.9688	0.9167	0.8438	0.9375	0.9167	0.275	0.1	0.075	0.15		0.1867	0.7327	0.1847
ASGA0091359	2	96158022	A	G		0	0	0	0	0.4375	0.4167	0.8125	0.5312	0.5455	0	0.05	0	0.0167		0.113	0.0083	1
ASGA0012212	2	140996142	T	C		0.65	0.55	0.6	0.6	0	0	0	0.0312	0.0076	0.75	0.375	0.55	0.5583		0.0185	0.956	0.9742
ALGA0016543	2	145257971	T	C		0.225	0.525	0.275	0.3417	0.5	0.6111	0.4062	0.4375	0.4924	0	0	0	0		1	0.8332	0.094
MARC0065978	3	55717402	G	A		1	1	1	1	0	0	0.0312	0.0938	0.0303	0	0	0	0		1	0.0039	1
ALGA0019771	3	77636015	A	G		0.775	0.55	0.825	0.7167	0.125	0.0278	0.0625	0.0938	0.0758	0.775	0.575	0.8	0.7167		0.326	0.7803	0.1297
DIAS0003766	3	81986256	A	G		0.975	1	0.95	0.975	0	0	0	0	0	0	0	0	0		1	1	0.0992
ALGA0107390	3	86085644	T	C		1	0.95	0.95	0.9667	0	0	0	0	0	0	0	0	0		1	1	0.0054
ASGA0101711	3	123638149	T	C		0.975	1	0.975	0.9833	0.0625	0	0	0	0.0152	0	0	0.05	0.0167		0.113	0.3228	0.5773
ASGA0016597	3	132275049	T	C		0.725	0.875	0.75	0.7833	0.0938	0	0	0	0.0227	0.525	0.575	0.575	0.5583		0.9982	0.0117	0.5505
ALGA0024245	4	30874523	T	C		0.525	0.7	0.3	0.5083	0	0	0	0.0312	0.0076	0.425	0.425	0.725	0.525		0.0458	0.956	0.0091
ASGA0019402	4	41300090	A	G		1	1	1	1	0	0.0556	0	0	0.0152	0	0	0	0		1	0.3969	1
DRGA0004757	4	43615316	C	T		1	0.925	1	0.975	0	0	0	0	0	0	0	0	0		1	1	0.0012
ALGA0025201	4	61401615	T	C		0.8	0.65	0.6	0.6833	0.0312	0	0	0.0625	0.0227	0.7	0.725	0.4	0.6083		0.0413	0.1199	0.4464
INRA0014351	4	66793036	C	T		1	1	1	1	0	0	0	0	0	0	0	0.075	0.025		0.0012	1	1
MARC0090092	4	68409038	T	C		1	1	1	1	0	0	0	0	0	0	0	0.075	0.025		0.0012	1	1
INRA0014612	4	73495852	A	C		1	1	1	1	0	0	0	0	0	0	0	0	0		1	1	1
ASGA0021073	4	103804488	G	A		0.05	0.1	0.075	0.075	0.5625	0.7222	0.6562	0.8438	0.697	0	0	0	0		1	0.3383	0.9768
ALGA0031043	5	19526692	T	C		0.05	0.05	0.175	0.0917	0	0	0	0	0	0.25	0.525	0.625	0.4667		0.0111	1	0.4347
ALGA0031742	5	39327879	T	G		0.925	1	1	0.975	0	0	0	0	0	0	0	0	0		1	1	0.0012
DRGA0005727	5	40915894	T	C		0.925	1	1	0.975	0.4688	0.1667	0.5625	0.1562	0.3333	0	0	0	0		1	0.0011	0.0012
INRA0019276	5	42724575	C	A		0.95	1	1	0.9833	0	0	0	0	0	0	0	0	0		1	1	0.113
ASGA0025483	5	44622629	G	A		0.95	1	1	0.9833	0	0	0	0	0	0	0	0	0		1	1	0.113
DRGA0005762	5	45252255	T	C		0.95	1	1	0.9833	0	0	0	0	0	0	0	0	0		1	1	0.113
DRGA0005767	5	46381993	G	A		1	1	1	1	0	0	0	0	0	0	0	0	0		1	1	1
ALGA0031838	5	47243385	G	T		1	1	1	1	0	0	0	0	0	0	0	0	0		1	1	1
MARC0046863	5	48236817	T	C		1	1	1	1	0	0	0	0	0	0	0	0	0		1	1	1
DRGA0005792	5	49040715	G	A		1	1	1	1	0	0	0	0	0	0	0	0	0		1	1	1
ALGA0031894	5	50991368	C	T		0.95	1	1	0.9833	0	0	0	0	0	0	0	0	0		1	1	0.113
INRA0019346	5	52798149	T	C		1	1	1	1	0	0	0	0	0	0	0	0	0		1	1	1
ALGA0032094	5	62157042	C	T		0.675	0.85	0.5	0.675	0.0312	0.0556	0	0	0.0227	0.575	0.4	0.575	0.5167		0.6412	0.193	0.0127
ALGA0108031	5	67710315	G	A		0.425	0.2	0.125	0.25	0.5312	0.4444	0.4375	0.4375	0.4621	0	0	0	0		1	0.9973	0.0448
ALGA0032500	5	68352730	G	A		0.8	0.425	0.7	0.6417	0.4688	0.3889	0.5938	0.5625	0.5	0.05	0	0	0.0167		0.113	0.8169	0.0122
ASGA0026083	5	69584032	G	A		0.3	0.55	0.725	0.525	0.4688	0.6667	0.375	0.5938	0.5303	0	0.025	0	0.0083		0.8239	0.3956	0.0033
INRA0020365	5	96352161	C	T		1	1	1	1	0	0.0556	0	0	0.0152	0	0	0	0		1	0.3969	1
ALGA0037079	6	133726563	A	G		0.975	0.925	1	0.9667	0	0	0	0	0	0	0	0	0		1	1	0.0041
ALGA0117693	6	148742719	G	A		0.975	0.95	1	0.975	0	0	0	0	0	0	0	0.05	0.0167		0.113	1	0.0992
ASGA0094022	6	151217323	C	T		0.15	0.15	0.45	0.25	0.8438	0.8611	0.8438	0.8125	0.8409	0.025	0.025	0.1	0.05		0.675	0.9999	0.0259
MARC0041948	6	152894649	A	G		0	0	0	0	0	0	0	0	0	0.625	0.675	0.35	0.55		0.0546	1	1
MARC0115216	7	3195217	T	C		0.975	1	1	0.9917	0	0	0	0	0	0	0	0.075	0.025		0.0012	1	0.8239
DBKK0000285	7	60252514	A	C		0	0	0	0	0	0	0	0	0	0.425	0.775	0.775	0.6583		0.0097	1	1
H3GA0021983	7	67646165	T	C		0.025	0	0	0.0083	0	0	0.0625	0	0.0152	0.575	0.625	0.525	0.575		0.9752	0.3228	0.8239
ALGA0042537	7	77009237	T	C		0.05	0	0.05	0.0333	0.7812	0.8333	0.375	0.6562	0.6667	0.15	0.025	0.075	0.0833		0.2193	0.0034	0.0054
DRGA0007820	7	77973037	A	G		0.05	0	0.025	0.025	0.9375	0.8611	0.75	0.5625	0.7803	0.15	0.2	0.05	0.1333		0.2172	0.0028	0.0992
DIAS0000146	7	109783926	A	G		1	1	0.925	0.975	0	0	0.0625	0.0312	0.0227	0	0	0	0		1	0.1199	0.0012
ALGA0045522	7	127332840	C	T		0.8	0.75	0.9	0.8167	0.8125	0.5278	0.3438	0.4062	0.5227	0	0	0.025	0.0083		0.8239	0.0011	0.5345
H3GA0024530	8	23601551	A	C		0.375	0.375	0.3	0.35	0.5938	0.8056	0.6562	0.4688	0.6364	0	0.025	0	0.0083		0.8239	0.1626	0.9835
BGIS0004952	8	39300733	T	C		1	0.975	0.95	0.975	0	0	0	0	0	0	0	0	0		1	1	0.0992
ASGA0038742	8	41242759	T	C		1	0.975	1	0.9917	0	0	0	0	0	0	0	0	0		1	1	0.8239
ALGA0047876	8	52213568	C	T		0	0	0	0	0.5312	0.5	0.875	0.5938	0.6212	0.05	0	0	0.0167		0.113	0.0024	1
H3GA0024898	8	61863927	T	C		1	1	1	1	0.125	0.3611	0.4688	0.125	0.2727	0	0	0	0		1	0.0084	1
ALGA0047992	8	65489064	A	G		0	0	0	0	0.9375	0.75	0.6875	0.5938	0.7424	0.025	0.075	0	0.0333		0.0041	0.0011	1
INRA0029873	8	69998730	A	G		0	0	0.05	0.0167	0.5312	0.2778	0.6562	0.5938	0.5076	0	0.025	0	0.0083		0.8239	0.0575	0.113
ALGA0048179	8	77021275	C	T		1	1	0.975	0.9917	0	0.0833	0.0312	0	0.0303	0	0	0	0		1	0.011	0.8239
ALGA0048253	8	78671695	T	C		1	1	1	1	0	0	0.0312	0	0.0076	0	0	0	0		1	0.956	1
ASGA0039683	8	121829327	A	G		0.975	0.975	1	0.9833	0	0	0	0	0	0	0	0	0		1	1	0.5773
ASGA0039832	8	130909240	T	C		0.975	1	1	0.9917	0	0	0	0	0	0	0.025	0	0.0083		0.8239	1	0.8239
INRA0030531	8	131517760	C	A		1	1	1	1	0	0	0	0	0	0	0.025	0	0.0083		0.8239	1	1
H3GA0025494	8	135031919	T	G		0.55	0.25	0.475	0.425	0.0625	0	0	0	0.0152	0.425	0.5	0.575	0.5		0.8706	0.3228	0.0921
ASGA0095368	8	145709748	C	A		0.25	0.05	0.025	0.1083	0.6875	0.6667	0.7188	0.2812	0.5909	0	0.025	0	0.0083		0.8239	0.0054	0.0023
H3GA0055769	9	12292138	C	A		0.55	0.375	0.3	0.4083	0.2188	0.0833	0.3438	0.3438	0.2424	0.95	0.775	0.775	0.8333		0.0232	0.0366	0.3398
ALGA0119045	9	15055604	G	A		0.075	0.275	0.1	0.15	0.9062	0.9444	0.5625	0.9375	0.8409	0.475	0.2	0.2	0.2917		0.0876	0.0011	0.1867
BGIS0007566	9	53579054	A	G		1	1	1	1	0	0	0	0.0312	0.0076	0	0	0.05	0.0167		0.113	0.956	1
ASGA0043529	9	66808115	T	C		0.575	0.4	0.2	0.3917	0	0	0	0	0	0.65	0.35	0.4	0.4667		0.1073	1	0.0117
ASGA0096819	9	73486663	A	C		0	0.025	0	0.0083	0.75	0.6944	0.5938	0.6875	0.6818	0	0	0	0		1	0.9675	0.8239
ASGA0043850	9	85054037	C	T		0.575	0.225	0.3	0.3667	0.5	0.6111	0.6562	0.8438	0.6515	0	0	0.075	0.025		0.0012	0.0952	0.0279
ALGA0054899	9	129924803	T	C		0.975	1	1	0.9917	0.0312	0	0	0	0.0076	0	0.05	0.05	0.0333		0.0054	0.956	0.8239
H3GA0028160	9	130830299	C	T		1	1	1	1	0.0312	0	0	0	0.0076	0	0.05	0.05	0.0333		0.0054	0.956	1
H3GA0053792	10	13926830	T	C		0.375	0.125	0.275	0.2583	0.7188	0.9444	0.9688	0.875	0.8788	0.3	0.375	0.2	0.2917		0.654	0.0292	0.1139
ALGA0057773	10	25842467	A	G		0.325	0.325	0.45	0.3667	0.4062	0.6389	0.5938	0.5	0.5379	0	0.025	0	0.0083		0.8239	0.7218	0.8818
M1GA0014504	11	55295	C	T		1	1	1	1	0.0938	0	0	0	0.0227	0	0	0	0		1	0.0117	1
INRA0036515	11	55728615	G	A		0.05	0	0	0.0167	0.3125	0.25	0.4062	0.4688	0.3561	0.85	0.975	0.875	0.9		0.0686	0.7316	0.113
M1GA0016423	12	23116412	T	C		1	0.95	1	0.9833	0	0	0	0	0	0	0	0	0		1	1	0.113
MARC0072483	12	46436962	A	G		0.35	0.3	0.475	0.375	0.625	0.7222	0.8125	0.7188	0.7197	0	0.025	0	0.0083		0.8239	0.8818	0.733
ASGA0104770	12	60372315	C	T		0.05	0.3	0.2	0.1833	0.4688	0.5556	0.7812	0.4062	0.553	0	0.025	0	0.0083		0.8239	0.0604	0.0034
MARC0010739	13	40671308	A	G		0.925	1	1	0.975	0.3438	0.25	0.3125	0.0938	0.25	0	0	0	0		1	0.1375	0.0012
ALGA0069709	13	42825042	A	G		1	1	0.925	0.975	0	0	0	0.0938	0.0227	0	0	0	0		1	0.0117	0.0012
MARC0094198	13	43808238	T	C		1	1	1	1	0	0	0	0.0938	0.0227	0	0	0	0		1	0.0117	1
ALGA0114810	13	49676914	A	G		0.675	0.65	0.475	0.6	0.5312	0.5833	0.2188	0.5938	0.4848	0	0.025	0	0.0083		0.8239	0.0206	0.5535
ASGA0057953	13	71998014	C	T		0.225	0.025	0.05	0.1	0.3438	0.3333	0.5938	0.75	0.5	0	0	0	0		1	0.006	0.0107
ALGA0070726	13	73168055	T	G		0	0	0.05	0.0167	0	0	0	0.0312	0.0076	0.9	0.65	0.625	0.725		0.006	0.956	0.113
INRA0040831	13	115237462	T	C		0.975	1	1	0.9917	0	0	0	0	0	0	0.075	0	0.025		0.0012	1	0.8239
INRA0040844	13	117860412	A	G		0.975	1	1	0.9917	0	0	0	0	0	0	0.075	0	0.025		0.0012	1	0.8239
INRA0040883	13	124139277	A	G		1	0.925	1	0.975	0	0	0	0	0	0	0.05	0	0.0167		0.113	1	0.0012
ALGA0076648	14	30849871	A	G		0	0	0.025	0.0083	0.8125	0.7778	0.8125	0.5625	0.7424	0.025	0.15	0.2	0.125		0.0029	0.4791	0.8239
DBMA0000255	14	131114363	A	G		0.525	0.75	0.825	0.7	0.375	0.6944	0.375	0.4375	0.4773	0	0	0	0		1	0.136	0.0819
M1GA0019170	14	135148446	G	A		1	1	0.925	0.975	0	0	0	0	0	0	0	0	0		1	1	0.0012
ALGA0113804	15	2724715	C	T		0.375	0.5	0.2	0.3583	0.0625	0.0833	0.0625	0.4062	0.1515	0.9	0.75	0.65	0.7667		0.0658	0.0069	0.0898
INRA0048834	15	14037549	G	A		0.525	0.475	0.6	0.5333	0.5625	0.3056	0.375	0.6875	0.4773	0	0	0	0		1	0.052	0.9352
ALGA0084945	15	40545702	T	G		0.6	0.825	0.825	0.75	0.1562	0.1389	0.0938	0.0312	0.1061	0.75	0.625	0.65	0.675		0.8843	0.4387	0.2307
ALGA0088237	15	148849949	G	A		0.025	0.2	0.05	0.0917	0.2812	0.2778	0.3438	0.1875	0.2727	1	1	1	1		1	0.9442	0.0393
MARC0040430	16	2142400	T	C		0.625	0.55	0.5	0.5583	0.8125	0.8056	0.6562	0.5312	0.7045	0.025	0.025	0.15	0.0667		0.1632	0.2535	0.9335
ASGA0071886	16	2745009	G	A		0.05	0.125	0.35	0.175	0	0.0833	0	0.0312	0.0303	0.575	0.725	0.5	0.6		0.4361	0.011	0.0016
ASGA0072342	16	14465203	T	C		0.175	0.45	0.2	0.275	0.7812	0.6111	0.2812	0.4688	0.5379	0	0	0	0		1	0.0017	0.1041
H3GA0046303	16	24940106	A	G		0.125	0.075	0.05	0.0833	0.9688	1	1	0.9375	0.9773	0.5	0.35	0.125	0.325		0.0015	0.1204	0.9
ALGA0090172	16	35245008	G	A		0.45	0.65	0.35	0.4833	0.0312	0.1944	0.1875	0.0625	0.1212	0.55	0.575	0.875	0.6667		0.0016	0.0828	0.1461
MARC0080217	16	58476421	A	G		1	1	1	1	0	0	0	0.0625	0.0152	0	0	0.025	0.0083		0.8239	0.3228	1
ALGA0094674	17	39199731	T	C		0.075	0.3	0.125	0.1667	0.5	0.8333	0.8125	0.625	0.697	0.075	0.1	0.025	0.0667		0.6412	0.0653	0.1145
ALGA0095308	17	50025811	C	T		1	0.975	0.925	0.9667	0	0	0	0	0	0	0	0	0		1	1	0.0041
MARC0041179	18	617438	A	G		0.925	0.975	0.9	0.9333	0	0	0	0	0	0.35	0.65	0.4	0.4667		0.1073	1	0.6412
ALGA0097196	18	16559678	A	G		1	1	1	1	0	0	0	0	0	0	0	0	0		1	1	1
ASGA0079061	18	17817003	A	G		0.85	0.85	0.675	0.7917	0.625	0.6944	0.4375	0.5938	0.5909	0	0.025	0.05	0.025		0.0992	0.6555	0.4644
ASGA0079737	18	44927369	C	T		1	0.95	1	0.9833	0	0	0	0	0	0	0	0	0		1	1	0.113
DBWU0000187	18	46589140	C	A		0.3	0.525	0.725	0.5167	0.0938	0.0278	0	0	0.0303	0.725	0.475	0.425	0.5417		0.0847	0.0101	0.0034
M1GA0023257	18	48941351	C	T		1	0.925	1	0.975	0	0	0.0938	0	0.0227	0	0	0	0		1	0.0117	0.0012
ALGA0098723	18	54367433	T	C		1	1	0.975	0.9917	0	0	0	0	0	0	0	0.075	0.025		0.0012	1	0.8239
ALGA0098742	18	55295182	T	C		1	1	1	1	0	0	0	0	0	0	0	0.05	0.0167		0.113	1	1
ASGA0080420	18	58822946	G	A		1	1	1	1	0.0938	0	0	0	0.0227	0	0.025	0.075	0.0333		0.0041	0.0117	1

## Sheet: Table S8
Table S8. The mean of three ancestry proportions of all the 61 populations from test data set.
Breed Abbreviation	Location		129 AIMs				Genome-wide data
			ECHP	SCHP	EUCP		ECHP	SCHP	EUCP
LDR2	European		0.0012	0.0014	0.9974		0.0004	0.0038	0.9958
LDR3	European		0.0083	0.0044	0.9874		0.0004	0.0106	0.989
CNLZ	Sichuan,China		0.4484	0.5516	0		0.4343	0.5657	0
THCD	ChiangMai,Thailand		0.614	0.1065	0.2795		0.6099	0.1146	0.2755
PIT3	European		0.0208	0.0133	0.9659		0.0053	0.0275	0.9672
DUR3	European		0.0101	0.0036	0.9864		0.0244	0.0024	0.9732
DUR1	European		0.0044	0.0026	0.993		0.0238	0.0007	0.9755
CNJQ	Jiangxi,China		0.8737	0.0435	0.0828		0.8906	0.0201	0.0893
CNGS	Gansu,China		0.5543	0.4158	0.0299		0.5775	0.3962	0.0263
CNTC	Hubei,China		0.565	0.4209	0.0141		0.5405	0.4483	0.0112
UKMW	European		0.0129	0.0761	0.911		0.0002	0.0521	0.9477
LWT1	European		0.0067	0.0973	0.896		0	0.0681	0.9319
PIT2	European		0.0191	0.0214	0.9595		0.0019	0.0505	0.9476
LDR6	European		0.0223	0.0178	0.9599		0.0019	0.0032	0.9949
USBK	European		0.0214	0.0155	0.9631		0.0019	0	0.9981
USPC	European		0.0446	0.001	0.9544		0.0071	0.0024	0.9905
CSLM	NA		0.4992	0.0455	0.4553		0.5128	0.002	0.4852
CNWZ	Hainan,China		0.0828	0.8858	0.0315		0.0513	0.9104	0.0383
CNDQ	Yunnan,China		0.393	0.5828	0.0241		0.3682	0.6173	0.0145
LDR5	European		0.0289	0.0354	0.9358		0.0002	0.0265	0.9733
CNNJ	Sichuan,China		0.4942	0.4781	0.0277		0.4546	0.5153	0.0301
LWT3	European		0.0386	0.0672	0.8942		0.0001	0.0631	0.9368
CNKL	Guizhou,China		0.262	0.4289	0.3091		0.3067	0.4275	0.2657
CNLA	FuJian,China		0.3169	0.4044	0.2787		0.2793	0.448	0.2727
CSPL	European		0.0325	0.0768	0.8907		0.0051	0.0606	0.9343
CNML	Tibet,China		0.3783	0.479	0.1428		0.3601	0.5299	0.11
CNLC	Shandong,China		0.2368	0.1254	0.6378		0.2635	0.1443	0.5921
LDR7	European		0.0195	0.0392	0.9413		0.004	0.0066	0.9894
CNGX	Jiangxi,China		0.5123	0.4867	0.0009		0.5702	0.4298	0
CNWN	Anhui,China		0.8146	0.1679	0.0174		0.8279	0.094	0.0782
CNHT	Inner Mongolia,China		0.7407	0.1133	0.146		0.6925	0.1707	0.1367
CNDS	Guangxi,China		0.3284	0.669	0.0027		0.26	0.7399	0
CNSZ	Hunan,China		0.544	0.456	0		0.4591	0.5409	0
UKBK	European		0.0592	0.012	0.9288		0.0022	0	0.9978
LWT4	European		0.0516	0.0816	0.8668		0.008	0.0642	0.9278
CNZA	Tibet,China		0.3223	0.4678	0.2098		0.3649	0.3979	0.2372
CNMG	Yunnan,China		0.4001	0.48	0.12		0.2846	0.5946	0.1207
CNWB2	China		0.6642	0.3287	0.0071		0.5625	0.3318	0.1057
CNLH	Shandong,China		0.7437	0.1627	0.0936		0.7705	0.0905	0.1391
CNXZ	Tibet,China		0.3974	0.5102	0.0925		0.3442	0.5871	0.0686
USHS	European		0.0367	0.0442	0.9191		0.0025	0	0.9975
CNBM	Gansu,China		0.5168	0.3605	0.1227		0.607	0.2802	0.1128
CNMZ	HeiLongJiang,China		0.5325	0.2456	0.2219		0.6457	0.1291	0.2252
KPKO	Korea_Local		0.2016	0.0937	0.7047		0.1858	0.0005	0.8137
LDR4	European		0.0069	0.0105	0.9826		0	0.1563	0.8436
DUR4	European		0.0036	0.0053	0.9911		0.0098	0.1525	0.8377
LWT2	European		0.0218	0.0897	0.8886		0	0.1913	0.8087
CNWB1	China		0.5232	0.4716	0.0052		0.4021	0.4791	0.1188
THJT	ChiangMai,Thailand		0.3519	0.5824	0.0658		0.2941	0.5406	0.1653
CNLT	Guangxi,China		0.2245	0.7664	0.0091		0.1063	0.7905	0.1032
CNWB4	China		0.466	0.5166	0.0174		0.3595	0.5765	0.064
CNGU	Guizhou,China		0.2521	0.5541	0.1938		0.2882	0.4388	0.273
CNDN	Yunnan,China		0.184	0.731	0.085		0.0303	0.8917	0.078
CNRC	Sichuan,China		0.4212	0.5406	0.0382		0.4844	0.4295	0.0861
CNLP	Jiangsu,China		0.5423	0.3909	0.0669		0.6619	0.2453	0.0928
CNWB3	China		0.5612	0.4219	0.0169		0.396	0.5598	0.0442
CNST	Jiangsu,China		0.3285	0.0158	0.6557		0.4951	0.0361	0.4687
UKHS	European		0.118	0.0438	0.8381		0	0	1
RUMS	European		0.1428	0.478	0.3791		0	0.5349	0.4651
THOK	ChiangMai,Thailand		0.276	0.6185	0.1055		0.3527	0.4727	0.1746
CNXI	Guizhou,China		0.0258	0.9722	0.0019		0.1373	0.7919	0.0707
